# Supplementary material for: Repeated losses of PRDM9-directed recombination despite the conservation of PRDM9 across vertebrates
Source: eLife. 2017 Jun 6;6:e24133. doi: 10.7554/eLife.24133 (PMC5519329; doi:10.7554/eLife.24133)
Supplement: Supplementary file 1. — Includes which amino acids align to each of three catalytic tyrosine residues of the human PRDM9 SET domain for each PRDM9 ortholog. (B) Genomes targeted for the PRDM9 search. Major groups or individual species lacking PRDM9 in RefSeq were targeted for further analysis of their whole genome sequences, with the exception of previously reported bird and crocodilian losses. Species included and results of this search are reported here. DOI: http://dx.doi.org/10.7554/eLife.24133.022 [file elife-24133-supp1.xlsx]

## Sheet: 1A
Supplementary File 1A. Summary data for a curated dataset of PRDM9 orthologs identified in RefSeq and whole genome databases, and testis-specific transcriptomes. Includes which amino acids are found aligning to each of three catalytic tyrosine residues of the human PRDM9 SET domain for each PRDM9 ortholog.
*A single transcript corresponding to a complete PRDM9 ortholog from P. marinus was tentatively assigned as corresponding to each of the available gene models predicted from the whole genome assembly because, lacking the C2H2 zinc finger array, we could not discern from which of these genes the transcript originated (DNA percent identities ranged from 97.89 tp 98.54%)
Species	Major clade	Data source	Domain architecture	Accession (nucleotide)	Accession (protein)	Gene name	Transcript	Y276	Y341	Y357
Lethenteron camtschaticum	Jawless fish	WGS	SSXRD-SET	NA	NA	LC1	NA	Y	Y	Y
Petromyzon marinus	Jawless fish	WGS	KRAB-SSXRD-SET	NA	NA	PM1	Locus_149*	Y	Y	Y
Petromyzon marinus	Jawless fish	WGS	KRAB-SSXRD-SET	NA	NA	PM2	Locus_149*	Y	Y	Y
Petromyzon marinus	Jawless fish	WGS	KRAB-SSXRD-SET	NA	NA	PM3	Locus_149*	Y	Y	Y
Petromyzon marinus	Jawless fish	WGS	KRAB-SSXRD-SET	NA	NA	PM4	Locus_149*	Y	Y	Y
Petromyzon marinus	Jawless fish	WGS	KRAB-SSXRD-SET	NA	NA	PM5	Locus_149*	Y	Y	Y
Callorhinchus milii	Cartilaginous fish	WGS	KRAB-SET	NA	NA	CM1	NA	Y	Y	Y
Callorhinchus milii	Cartilaginous fish	WGS	KRAB-SET	NA	NA	CM2	NA	Y	Y	Y
Rhincodon Typus	Cartilaginous fish	WGS	KRAB-SSXRD-SET	NA	NA	RT1	NA	Y	Y	Y
Anguilla anguilla	Bony fish	WGS	KRAB-SSXRD-SET	NA	NA	AA1	Locus_15790	-	Y	Y
Anguilla japonica	Bony fish	WGS	SSXRD-SET	NA	NA	AJ1	NA	Y	Y	Y
Anguilla rostrata	Bony fish	WGS	KRAB-SSXRD-SET	NA	NA	AR1	NA	Y	Y	Y
Anguilla rostrata	Bony fish	WGS	KRAB-SSXRD-SET	NA	NA	AR2	NA	Y	Y	Y
Anguilla rostrata	Bony fish	WGS	SET	NA	NA	AR3	NA	Y	F	Y
Anguilla rostrata	Bony fish	WGS	SET	NA	NA	AR5	NA	Y	Y	C
Astyanax mexicanus	Bony fish	RefSeq	SET	XM_015601967.1	XP_015457453	LOC103042434	Locus_12285	Y	Y	Y
Astyanax mexicanus	Bony fish	RefSeq	SET	XM_007232858.2	XP_007232920	LOC103033426	Locus_1939	L	F	Y
Brevoortia tyrannus	Bony fish	transcript	KRAB-SSXRD-SET	NA	NA	BT1	Locus_1252	Y	Y	Y
Clupea harengus	Bony fish	RefSeq	SET	XM_012839010.1	XP_012694464	LOC105910301	NA	Y	Y	Y
Clupea harengus	Bony fish	RefSeq	SET	XM_012837665.1	XP_012693119	LOC105909076	NA	Y	F	Y
Clupea harengus	Bony fish	RefSeq	SET	XM_012832960.1	XP_012688414	LOC105904988	NA	-	Y	Y
Clupea harengus	Bony fish	RefSeq	SET	XM_012832953.1	XP_012688407	LOC105904982	NA	Y	Y	Y
Clupea harengus	Bony fish	RefSeq	SET	XM_012828810.1	XP_012684264	LOC105901378	NA	Y	Y	Y
Clupea harengus	Bony fish	RefSeq	SET	XM_012828080.1	XP_012683534	LOC105900721	NA	Y	Y	Y
Cynoglossus semilaevis	Bony fish	RefSeq	SET	XM_008314357.2	XP_008312579	LOC103381812	NA	Y	F	P
Cyprinus carpio	Bony fish	WGS	SET	NA	NA	CC1	NA	F	F	Y
Cyprinus carpio	Bony fish	WGS	SET	NA	NA	CC2	NA	F	F	Y
Danio rerio	Bony fish	RefSeq	SET	NM_200902.1	NP_957196	prdm9	Locus_13877	F	F	Y
Esox lucius	Bony fish	RefSeq	SET	XM_010888657.2	XP_010886959	LOC105021172	Locus_3683	Y	F	P
Esox lucius	Bony fish	WGS	KRAB-SSXRD-SET	XM_013132385.1	XP_012987839	LOC105009593	Locus_288	Y	Y	Y
Esox lucius	Bony fish	WGS	SET	XM_010905246.1	XP_010903548	LOC105031050	Locus_8038	Y	Y	Y
Esox lucius	Bony fish	WGS	SET	NA	NA	EL1	NA	Y	F	P
Fundulus heteroclitus	Bony fish	RefSeq	SET	XM_012871696.1	XP_012727150	LOC105932499	NA	Y	F	P
Gadus morhua	Bony fish	WGS	SET	NA	NA	GM1	Locus_164	Y	Y	Y
Gadus morhua	Bony fish	WGS	SET	NA	NA	GM2	Locus_8486	Y	F	P
Haplochromis burtoni	Bony fish	RefSeq	SET	XM_005913560.2	XP_005913622	LOC102302769	NA	F	F	P
Ictalurus punctatus	Bony fish	WGS	SET	XM_017484877.1	XP_017340366	LOC108274655	Locus_2586	Y	Y	Y
Ictalurus punctatus	Bony fish	WGS	SET	XM_017473539.1	XP_017329028	LOC108268514	Locus_2594	Y	Y	Y
Ictalurus punctatus	Bony fish	WGS	SET	XM_017466072.1	XP_017321561	LOC108264487	Locus_1123	Y	Y	Y
Ictalurus punctatus	Bony fish	WGS	SET	XM_017456674.1	XP_017312163	LOC108258194	Locus_27439	F	F	Y
Ictalurus punctatus	Bony fish	WGS	SET	XM_017459046.1	XP_017314535	LOC108259500	NA	Y	Y	Y
Ictalurus punctatus	Bony fish	WGS	SET	XM_017484168.1	XP_017339657	LOC108274183	NA	Y	Y	Y
Ictalurus punctatus	Bony fish	WGS	SET	NA	NA	IP2	Locus_7020	Y	Y	Y
Ictalurus punctatus	Bony fish	WGS	SET	NA	NA	IP10	NA	Y	Y	Y
Larimichthys crocea	Bony fish	RefSeq	SET	XM_010749492.1	XP_010747794	LOC104933940	NA	Y	Y	P
Lepisosteus oculatus	Bony fish	RefSeq	SET	XM_015346147.1	XP_015201633	LOC102684919	Locus_6947	Y	F	Y
Lepisosteus oculatus	Bony fish	RefSeq+transcript	KRAB-SSXRD-SET	XM_015339929.1	XP_015195415	prdm7	Locus_826	Y	Y	Y
Maylandia zebra	Bony fish	RefSeq	SET	XM_004556707.1	XP_004556764	LOC101474223	NA	F	F	P
Neolamprologus brichardi	Bony fish	RefSeq	SET	XM_006790934.1	XP_006790997	LOC102790270	NA	F	F	P
Nothobranchius furzeri	Bony fish	RefSeq	SET	XM_015962796.1	XP_015818282	znf286a	NA	Y	F	P
Notothenia coriiceps	Bony fish	RefSeq	SET	XM_010770676.1	XP_010768978	LOC104945047	NA	Y	Y	P
Oreochromis niloticus	Bony fish	RefSeq	SET	XM_005458179.2	XP_005458236	LOC100709898	NA	F	F	P
Oryzias latipes	Bony fish	RefSeq	SET	XM_011488351.1	XP_011486653	LOC101168249	NA	Y	Y	P
Osteoglossum bicirrhosum	Bony fish	transcript	SET	NA	NA	OB1	Locus_17337	Y	Y	H
Poecilia formosa	Bony fish	RefSeq	SET	XM_007571442.2	XP_007571504	LOC103151399	NA	Y	F	P
Poecilia latipinna	Bony fish	RefSeq	SET	XM_015031324.1	XP_014886810	LOC106946738	NA	Y	F	P
Poecilia mexicana	Bony fish	RefSeq	SET	XM_015011120.1	XP_014866606	LOC106932420	NA	Y	F	P
Poecilia reticulata	Bony fish	RefSeq	SET	XM_008437276.2	XP_008435498	LOC103481653	NA	Y	F	P
Pundamilia nyererei	Bony fish	RefSeq	SET	XM_005725898.2	XP_005725955	LOC102207111	NA	F	F	P
Pygocentrus nattereri	Bony fish	WGS	SET	XM_017686009.1	XP_017541498	LOC108413481	NA	F	F	Y
Pygocentrus nattereri	Bony fish	WGS	SET	XM_017717966.1	XP_017573455	LOC108439518	NA	Y	Y	Y
Salmo salar	Bony fish	RefSeq	SET	XM_014213122.1	XP_014068597	LOC106612178	NA	-	Y	Y
Salmo salar	Bony fish	RefSeq	SET	XM_014209909.1	XP_014065384	LOC106610521	NA	C	F	P
Salmo salar	Bony fish	RefSeq+transcript	KRAB-SSXRD-SET	XM_014201207.1	XP_014056682	LOC106605487	Locus_1436	Y	Y	Y
Salmo salar	Bony fish	RefSeq	SET	XM_014179841.1	XP_014035316	LOC106589631	Locus_41218	C	F	P
Salmo salar	Bony fish	RefSeq+WGS	KRAB-SSXRD-SET	NM_001173912.1	NP_001167383	prdm9	Locus_30430	Y	Y	Y
Salmo trutta	Bony fish	transcript	KRAB-SSXRD-SET	NA	NA	ST1	Locus_1800	Y	Y	Y
Salmo trutta	Bony fish	transcript	KRAB-SSXRD-SET	NA	NA	ST2	Locus_5837	Y	Y	Y
Salmo trutta	Bony fish	transcript	SET	NA	NA	ST3	Locus_1375	C	F	P
Scleropages formosus	Bony fish	WGS	SET	XM_018741992.1	XP_018597508	LOC108928188	NA	Y	Y	H
Scleropages formosus	Bony fish	WGS	SET	NA	NA	SF2	NA	Y	Y	H
Scleropages formosus	Bony fish	WGS	SET	NA	NA	SF3	NA	Y	Y	H
Scleropages formosus	Bony fish	WGS	SET	NA	NA	SF4	NA	Y	Y	H
Sinocyclocheilus anshuiensis	Bony fish	WGS	SET	XM_016470092.1	XP_016325578	LOC107675671	NA	F	F	Y
Sinocyclocheilus anshuiensis	Bony fish	WGS	SET	XM_016481125.1	XP_016336611	LOC107684768	NA	F	F	Y
Sinocyclocheilus grahami	Bony fish	WGS	SET	XM_016244761.1	XP_016100247	LOC107560549	NA	F	F	Y
Sinocyclocheilus grahami	Bony fish	WGS	SET	XM_016286309.1	XP_016141795	LOC107595784	NA	F	F	Y
Sinocyclocheilus rhinocerous	Bony fish	WGS	SET	XM_016518492.1	XP_016373978	LOC107713071	NA	F	F	Y
Sinocyclocheilus rhinocerous	Bony fish	WGS	SET	XM_016554477.1	XP_016409963	LOC107741704	NA	F	F	Y
Squalius pyrenaicus	Bony fish	WGS	SET	NA	NA	SP1	NA	L	F	Y
Squalius pyrenaicus	Bony fish	WGS	SET	NA	NA	SP2	NA	L	F	Y
Takifugu rubripes	Bony fish	RefSeq	SET	XM_011602711.1	XP_011601013	LOC101067663	NA	Y	F	P
Xiphophorus maculatus	Bony fish	RefSeq	SET	XM_014473436.1	XP_014328922	LOC102216811	Locus_5816 (X. birchmanni)	Y	F	P
Latimeria chalumnae	Coelacanth	RefSeq+WGS	KRAB-SSXRD-SET	XM_005997995.2	XP_005998057	LOC102357625	NA	Y	Y	Y
Latimeria menadoensis	Coelacanth	transcript	KRAB-SSXRD-SET	NA	NA	LM1	Locus_428	Y	Y	Y
Boa constrictor	Squamata	WGS	KRAB-SSXRD-SET	NA	NA	BC1	NA	Y	Y	Y
Crotalus horridus	Squamata	WGS	KRAB-SSXRD-SET	NA	NA	CH1	NA	Y	Y	Y
Crotalus mitchelli	Squamata	WGS	KRAB-SSXRD-SET	NA	NA	CRM1	NA	Y	Y	Y
Deinagkistrodon acutus	Squamata	WGS	KRAB-SSXRD-SET	NA	NA	DA1	NA	Y	Y	Y
Eublepharis macularius	Squamata	WGS	KRAB-SSXRD-SET	NA	NA	EM1	NA	Y	Y	Y
Gekko japonicus	Squamata	WGS	KRAB-SSXRD-SET	NA	NA	GJ1	NA	Y	Y	Y
Ophiophagus hannah	Squamata	WGS	KRAB-SSXRD-SET	NA	NA	OH1	NA	Y	Y	Y
Ophiosaurus gracilis	Squamata	WGS	KRAB-SSXRD-SET	NA	NA	OG1	NA	Y	Y	Y
Pantherophis guttaris	Squamata	WGS	KRAB-SSXRD-SET	NA	NA	PG1	NA	Y	Y	Y
Pogona vitticeps	Squamata	WGS	KRAB-SSXRD-SET	NA	NA	PV1	Locus_10728+Locus_13762	Y	Y	Y
Protobothrops mucrosquamatus	Squamata	RefSeq+WGS	KRAB-SSXRD-SET	XM_015818509.1	XP_015673995	LOC107289708	NA	Y	Y	Y
Python bivittatus	Squamata	WGS	KRAB-SSXRD-SET	XM_007430451.1	XP_007430513	LOC103055134	NA	Y	Y	Y
Thamnophis sirtalis	Squamata	WGS	KRAB-SSXRD-SET	NA	NA	TS1	NA	Y	Y	Y
Vipera berus	Squamata	WGS	KRAB-SET	NA	NA	VB1	NA	Y	Y	Y
Apalone spinifera	Turtle	WGS	KRAB-SSXRD-SET	NA	NA	AS1	NA	Y	Y	Y
Chelonia mydas	Turtle	RefSeq	KRAB-SSXRD-SET	XM_007053408.1	XP_007053470	LOC102932627	NA	Y	Y	Y
Chrysemys picta bellii	Turtle	RefSeq	KRAB-SSXRD-SET	XM_005314305.2	XP_005314362	LOC101947848	NA	Y	Y	Y
Pelodiscus sinensis	Turtle	RefSeq	KRAB-SSXRD-SET	XM_006118340.2	XP_006118402	LOC102446823	NA	Y	Y	Y
Ornithorhynchus anatinus	Monotremata	WGS	SSXRD-SET	NA	NA	OA1	Locus_44459	Y	Y	Y
Ornithorhynchus anatinus	Monotremata	WGS	SET	NA	NA	OA2	Locus_5589	Y	Y	Y
Macropus eugenii	Marsupial	WGS	KRAB-SSXRD-SET	NA	NA	ME1	Locus_540	Y	Y	Y
Monodelphis domestica	Marsupial	WGS	KRAB-SSXRD-SET	NA	NA	MD1	Locus_69973	Y	Y	Y
Phasocolarctos cinereus	Marsupial	transcript	KRAB-SSXRD-SET	NA	NA	PC1	Locus_2211	Y	Y	Y
Sarcophilus harrisii	Marsupial	RefSeq	SSXRD-SET	XM_012545671.1	XP_012401125	LOC100923245	NA	Y	Y	Y
Acinonyx jubatus	Placental	RefSeq	KRAB-SSXRD-SET	XM_015083458.1	XP_014938944	LOC106985288	NA	Y	Y	Y
Ailuropoda melanoleuca	Placental	RefSeq	KRAB-SSXRD-SET	XM_002926812.1	XP_002926858	PRDM7	NA	Y	Y	Y
Balaenoptera acutorostrata scammoni	Placental	RefSeq	KRAB-SSXRD-SET	XM_007172595.1	XP_007172657	PRDM7	NA	Y	Y	Y
Bison bison bison	Placental	RefSeq	KRAB-SSXRD-SET	XM_010847405.1	XP_010845707	LOC104993967	NA	Y	Y	Y
Bison bison bison	Placental	RefSeq+WGS	KRAB-SSXRD-SET	XM_010833278.1	XP_010831580	LOC104983753	NA	Y	Y	Y
Bos mutus	Placental	RefSeq+WGS	KRAB-SSXRD-SET	XM_014478250.1	XP_014333736	LOC102271291	NA	Y	Y	Y
Bos mutus	Placental	RefSeq	KRAB-SSXRD-SET	XM_014478012.1	XP_014333498	LOC102282730	NA	Y	Y	Y
Bos taurus	Placental	RefSeq	KRAB-SSXRD-SET	XM_015470633.1	XP_015326119	PRDM7	NA	Y	Y	Y
Bos taurus	Placental	RefSeq	KRAB-SSXRD-SET	XM_015461807.1	XP_015317293	LOC100851938	NA	Y	Y	Y
Bos taurus	Placental	RefSeq	KRAB-SSXRD-SET	XM_015461536.1	XP_015317022	LOC520584	NA	Y	Y	Y
Bos taurus	Placental	RefSeq	SSXRD-SET	XM_015460866.1	XP_015316352	LOC100139638	NA	Y	Y	Y
Bos taurus	Placental	RefSeq	SSXRD-SET	XM_015460310.1	XP_015315796	LOC100336498	NA	Y	Y	Y
Bos taurus	Placental	RefSeq	KRAB-SSXRD-SET	NM_001319897.1	NP_001306826	PRDM9	NA	Y	Y	Y
Bubalus bubalis	Placental	RefSeq	KRAB-SSXRD-SET	XM_006071966.1	XP_006072028	PRDM9	NA	Y	Y	Y
Camelus bactrianus	Placental	RefSeq	KRAB-SSXRD-SET	XM_010969971.1	XP_010968273	PRDM7	NA	Y	Y	Y
Camelus dromedarius	Placental	RefSeq	KRAB-SSXRD-SET	XM_010999967.1	XP_010998269	PRDM7	NA	Y	Y	Y
Camelus ferus	Placental	RefSeq	KRAB-SSXRD-SET	XM_014560137.1	XP_014415623	PRDM7	NA	Y	Y	Y
Carlito syrichta	Placental	RefSeq	KRAB-SSXRD-SET	XM_008050056.1	XP_008048247	PRDM7	NA	Y	Y	Y
Ceratotherium simum simum	Placental	RefSeq	KRAB-SSXRD-SET	XM_004436416.1	XP_004436473	LOC101392897	NA	Y	Y	Y
Cercocebus atys	Placental	RefSeq	KRAB-SSXRD-SET	XM_012077315.1	XP_011932705	LOC105593797	NA	Y	Y	M
Cercocebus atys	Placental	RefSeq	SET	XM_012069660.1	XP_011925050	PRDM7	NA	Y	Y	Y
Chinchilla lanigera	Placental	RefSeq	KRAB-SSXRD-SET	XM_013505574.1	XP_013361028	LOC102004729	NA	Y	Y	Y
Chlorocebus sabaeus	Placental	RefSeq	KRAB-SSXRD-SET	XM_007961264.1	XP_007959455	PRDM9	NA	Y	Y	Y
Chrysochloris asiatica	Placental	RefSeq	SET	XM_006877017.1	XP_006877079	LOC102825979	NA	Y	Y	Y
Chrysochloris asiatica	Placental	RefSeq	KRAB-SSXRD-SET	XM_006876858.1	XP_006876920	LOC102825977	NA	Y	Y	Y
Colobus angolensis palliatus	Placental	RefSeq	SET	XM_011933022.1	XP_011788412	LOC105505231	NA	Y	Y	Y
Colobus angolensis palliatus	Placental	RefSeq	SSXRD-SET	XM_011928064.1	XP_011783454	PRDM7	NA	Y	Y	Y
Condylura cristata	Placental	RefSeq	KRAB-SSXRD-SET	XM_012722840.1	XP_012578294	PRDM7	NA	Y	Y	Y
Cricetulus griseus	Placental	RefSeq	KRAB-SSXRD-SET	XM_007617083.2	XP_007615273	LOC100752747	NA	Y	Y	Y
Dasypus novemcinctus	Placental	RefSeq	SET	XM_012529132.1	XP_012384586	LOC101444500	NA	Y	Y	Y
Dasypus novemcinctus	Placental	RefSeq	KRAB-SSXRD-SET	XM_012522320.1	XP_012377774	LOC101427800	NA	Y	Y	Y
Dipodomys ordii	Placental	RefSeq	KRAB-SSXRD-SET	XM_013013819.1	XP_012869273	LOC105983784	NA	Y	Y	Y
Echinops telfairi	Placental	RefSeq	KRAB-SSXRD-SET	XM_013005479.1	XP_012860933	PRDM7	NA	Y	Y	Y
Eptesicus fuscus	Placental	RefSeq	SSXRD-SET	XM_008161096.1	XP_008159318	LOC103304164	NA	Y	Y	Y
Equus caballus	Placental	RefSeq	SSXRD-SET	XM_014738294.1	XP_014593780	PRDM7	NA	Y	Y	Y
Equus przewalskii	Placental	RefSeq	KRAB-SSXRD-SET	XM_008544544.1	XP_008542766	PRDM7	NA	Y	Y	Y
Erinaceus europaeus	Placental	RefSeq	KRAB-SSXRD-SET	XM_016191807.1	XP_016047293	PRDM7	NA	Y	Y	Y
Felis catus	Placental	RefSeq	KRAB-SSXRD-SET	XM_003998383.2	XP_003998432	PRDM7	NA	Y	Y	Y
Fukomys damarensis	Placental	RefSeq	KRAB-SSXRD-SET	XM_010608527.1	XP_010606829	Prdm9	NA	-	Y	Y
Galeopterus variegatus	Placental	RefSeq	SSXRD-SET	XM_008565035.1	XP_008563257	LOC103583815	NA	F	Y	Y
Galeopterus variegatus	Placental	RefSeq	SSXRD-SET	XM_008564130.1	XP_008562352	LOC103582578	NA	Y	Y	Y
Galeopterus variegatus	Placental	RefSeq	KRAB-SSXRD-SET	XM_008563625.1	XP_008561847	LOC103581911	NA	Y	Y	Y
Gorilla gorilla gorilla	Placental	RefSeq	KRAB-SSXRD-SET	XM_004059007.1	XP_004059055	LOC101136369	NA	Y	Y	Y
Gorilla gorilla gorilla	Placental	RefSeq	KRAB-SSXRD-SET	XM_004058191.1	XP_004058239	PRDM7	NA	Y	Y	Y
Heterocephalus glaber	Placental	RefSeq	KRAB-SSXRD-SET	XM_013066468.1	XP_012921922	LOC101701112	NA	Y	Y	Y
Homo sapiens	Placental	RefSeq	KRAB-SSXRD-SET	NM_020227.3	NP_064612	PRDM9	NA	Y	Y	Y
Homo sapiens	Placental	RefSeq	KRAB-SSXRD-SET	NM_001098173.1	NP_001091643	PRDM7	NA	Y	Y	S
Ictidomys tridecemlineatus	Placental	RefSeq	KRAB-SSXRD-SET	XM_013364880.1	XP_013220334	LOC101956232	NA	Y	Y	Y
Jaculus jaculus	Placental	RefSeq	KRAB-SSXRD-SET	XM_004651065.1	XP_004651122	LOC101610194	NA	Y	Y	Y
Leptonychotes weddellii	Placental	RefSeq	SSXRD-SET	XM_006750674.1	XP_006750737	PRDM7	NA	Y	Y	Y
Lipotes vexillifer	Placental	RefSeq	KRAB-SSXRD-SET	XM_007468486.1	XP_007468548	PRDM7	NA	Y	Y	Y
Loxodonta africana	Placental	RefSeq	KRAB-SSXRD-SET	XM_010601864.1	XP_010600166	PRDM9	NA	Y	Y	Y
Macaca fascicularis	Placental	RefSeq	KRAB-SSXRD-SET	XM_015451241.1	XP_015306727	PRDM9	NA	Y	Y	Y
Macaca mulatta	Placental	RefSeq	KRAB-SSXRD-SET	XM_001083675.3	XP_001083675	PRDM9	NA	Y	Y	Y
Macaca nemestrina	Placental	RefSeq	KRAB-SSXRD-SET	XM_011726557.1	XP_011724859	PRDM9	NA	Y	Y	M
Mandrillus leucophaeus	Placental	RefSeq	KRAB-SSXRD-SET	XM_011999175.1	XP_011854565	LOC105553202	NA	Y	Y	M
Mandrillus leucophaeus	Placental	RefSeq	SSXRD-SET	XM_011972266.1	XP_011827656	PRDM7	NA	Y	Y	Y
Marmota marmota marmota	Placental	RefSeq	KRAB-SSXRD-SET	XM_015481050.1	XP_015336536	LOC107138448	NA	Y	Y	Y
Mesocricetus auratus	Placental	RefSeq	KRAB-SSXRD-SET	XM_013122741.1	XP_012978195	LOC101825348	NA	Y	Y	Y
Microcebus murinus	Placental	RefSeq+WGS	KRAB-SSXRD-SET	XM_012737208.1	XP_012592662	PRDM7	NA	Y	Y	Y
Microtus ochrogaster	Placental	RefSeq	KRAB-SSXRD-SET	XM_013352266.1	XP_013207720	LOC101982521	NA	Y	Y	Y
Miniopterus natalensis	Placental	RefSeq	KRAB-SSXRD-SET	XM_016215829.1	XP_016071315	LOC107539362	NA	H	Y	Y
Mus musculus	Placental	RefSeq	KRAB-SSXRD-SET	NM_144809.2	NP_659058	Prdm9	NA	Y	Y	Y
Mustela putorius furo	Placental	RefSeq	KRAB-SSXRD-SET	XM_013056864.1	XP_012912318	PRDM7	NA	Y	Y	Y
Myotis brandtii	Placental	RefSeq	SET	XM_014546243.1	XP_014401729	LOC102240554	NA	Y	Y	Y
Myotis brandtii	Placental	RefSeq	SSXRD-SET	XM_014543530.1	XP_014399016	LOC102262117	NA	Y	Y	Y
Myotis davidii	Placental	RefSeq	SSXRD-SET	XM_015559445.1	XP_015414931	LOC102765569	NA	Y	Y	Y
Myotis lucifugus	Placental	RefSeq	SSXRD-SET	XM_014450816.1	XP_014306302	LOC102440075	NA	Y	Y	Y
Myotis lucifugus	Placental	RefSeq	SSXRD-SET	XM_014445748.1	XP_014301234	LOC102430475	NA	Y	Y	Y
Myotis lucifugus	Placental	RefSeq	SSXRD-SET	XM_006108526.1	XP_006108588	LOC102441203	NA	Y	Y	Y
Nannospalax galili	Placental	RefSeq	KRAB-SSXRD-SET	XM_008843407.1	XP_008841629	Prdm9	NA	Y	Y	Y
Nomascus leucogenys	Placental	RefSeq	SSXRD-SET	XM_012505231.1	XP_012360685	PRDM7	NA	Y	Y	Y
Ochotona princeps	Placental	RefSeq	KRAB-SSXRD-SET	XM_012930960.1	XP_012786414	LOC101535585	NA	Y	Y	Y
Octodon degus	Placental	RefSeq	SSXRD-SET	XM_012513401.1	XP_012368855	LOC101575321	NA	Y	Y	N
Octodon degus	Placental	RefSeq	KRAB-SSXRD-SET	XM_012513326.1	XP_012368780	Prdm9	NA	Y	Y	Y
Octodon degus	Placental	RefSeq	KRAB-SSXRD-SET	XM_012513325.1	XP_012368779	LOC101567490	NA	Y	Y	Y
Octodon degus	Placental	RefSeq	SSXRD-SET	XM_012512912.1	XP_012368366	LOC101577431	NA	Y	Y	Y
Octodon degus	Placental	RefSeq	KRAB-SSXRD-SET	XM_012512792.1	XP_012368246	LOC101566810	NA	-	Y	Y
Odobenus rosmarus divergens	Placental	RefSeq	KRAB-SSXRD-SET	XM_012561567.1	XP_012417021	PRDM7	NA	Y	Y	Y
Orcinus orca	Placental	RefSeq	KRAB-SSXRD-SET	XM_004280126.1	XP_004280174	PRDM7	NA	Y	Y	Y
Orycteropus afer afer	Placental	RefSeq	SSXRD-SET	XM_007959318.1	XP_007957509	LOC103213575	NA	Y	Y	Y
Oryctolagus cuniculus	Placental	RefSeq	KRAB-SSXRD-SET	XM_017338435.1	XP_017193924	LOC100358830	NA	Y	Y	Y
Otolemur garnettii	Placental	RefSeq	SET	XM_012814055.1	XP_012669509	LOC100953233	NA	-	Y	Y
Otolemur garnettii	Placental	RefSeq	KRAB-SSXRD-SET	XM_012813959.1	XP_012669413	LOC100965706	NA	Y	Y	Y
Otolemur garnettii	Placental	RefSeq	SET	XM_012813958.1	XP_012669412	LOC100965068	NA	Y	Y	Y
Otolemur garnettii	Placental	RefSeq	SET	XM_012813941.1	XP_012669395	LOC100940489	NA	Y	Y	Y
Otolemur garnettii	Placental	RefSeq	KRAB-SSXRD-SET	XM_012810523.1	XP_012665977	LOC100957257	NA	Y	Y	Y
Ovis aries	Placental	RefSeq	KRAB-SSXRD-SET	XM_015105257.1	XP_014960743	LOC101103705	NA	Y	Y	Y
Ovis aries	Placental	RefSeq	SET	XM_012108802.2	XP_011964192	LOC101116534	NA	-	Y	Y
Ovis aries	Placental	RefSeq	KRAB-SSXRD-SET	XM_012107055.2	XP_011962445	LOC101118592	NA	Y	Y	Y
Ovis aries	Placental	RefSeq	KRAB-SSXRD-SET	XM_012106207.2	XP_011961597	LOC101120895	NA	Y	Y	Y
Ovis aries musimon	Placental	RefSeq	KRAB-SSXRD-SET	XM_015091002.1	XP_014946488	LOC101103705	NA	Y	Y	Y
Ovis aries musimon	Placental	RefSeq	KRAB-SSXRD-SET	XM_012169314.1	XP_012024704	LOC101101875	NA	Y	Y	Y
Ovis aries musimon	Placental	RefSeq	KRAB-SSXRD-SET	XM_012166124.2	XP_012021514	LOC101120895	NA	Y	Y	Y
Pan paniscus	Placental	RefSeq	KRAB-SSXRD-SET	XM_008961193.1	XP_008959441	PRDM9	NA	Y	Y	M
Pan troglodytes	Placental	RefSeq	SSXRD-SET	XM_016930466.1	XP_016785955	LOC750421	NA	Y	Y	S
Panthera tigris altaica	Placental	RefSeq	KRAB-SSXRD-SET	XM_007091109.1	XP_007091171	PRDM7	NA	Y	Y	Y
Papio anubis	Placental	RefSeq	KRAB-SSXRD-SET	XM_009208194.1	XP_009206458	PRDM9	NA	Y	Y	Y
Peromyscus maniculatus bairdii	Placental	RefSeq	KRAB-SSXRD-SET	XM_006975951.2	XP_006976013	LOC102907103	NA	Y	Y	Y
Physeter catodon	Placental	RefSeq	KRAB-SSXRD-SET	XM_007125515.1	XP_007125577	PRDM7	NA	Y	Y	Y
Pongo abelii	Placental	RefSeq	KRAB-SSXRD-SET	XM_009251087.1	XP_009249362	PRDM7	NA	Y	Y	M
Pongo abelii	Placental	RefSeq	KRAB-SSXRD-SET	XM_009240607.1	XP_009238882	PRDM9	NA	Y	Y	Y
Propithecus coquereli	Placental	RefSeq	KRAB-SSXRD-SET	XM_012657157.1	XP_012512611	PRDM7	NA	Y	Y	Y
Pteropus alecto	Placental	RefSeq	KRAB-SSXRD-SET	XM_015593139.1	XP_015448625	LOC102878419	NA	Y	Y	Y
Pteropus vampyrus	Placental	RefSeq	KRAB-SSXRD-SET	XM_011379124.1	XP_011377426	PRDM7	NA	Y	Y	Y
Pteropus vampyrus	Placental	RefSeq	KRAB-SSXRD-SET	XM_011378437.1	XP_011376739	LOC105304380	NA	Y	Y	Y
Rattus norvegicus	Placental	RefSeq	KRAB-SSXRD-SET	NM_001108903.2	NP_001102373	Prdm9	NA	Y	Y	Y
Rhinopithecus roxellana	Placental	RefSeq	KRAB-SSXRD-SET	XM_010383039.1	XP_010381341	LOC104677903	NA	Y	Y	M
Rhinopithecus roxellana	Placental	RefSeq	SSXRD-SET	XM_010378562.1	XP_010376864	PRDM7	NA	Y	Y	Y
Rousettus aegyptiacus	Placental	RefSeq	KRAB-SSXRD-SET	XM_016155816.1	XP_016011302	PRDM9	NA	Y	Y	Y
Rousettus aegyptiacus	Placental	RefSeq	KRAB-SSXRD-SET	XM_016140423.1	XP_015995909	LOC107508545	NA	Y	Y	Y
Sorex araneus	Placental	RefSeq	KRAB-SSXRD-SET	XM_004600789.1	XP_004600846	PRDM7	NA	Y	Y	Y
Sus scrofa	Placental	RefSeq+WGS	KRAB-SSXRD-SET	XM_013994213.1	XP_013849667	PRDM7	NA	Y	Y	Y
Trichechus manatus latirostris	Placental	RefSeq	KRAB-SSXRD-SET	XM_004378704.1	XP_004378761	LOC101353821	NA	Y	Y	Y
Tupaia chinensis	Placental	RefSeq	KRAB-SSXRD-SET	XM_014590100.1	XP_014445586	PRDM9	NA	Y	Y	Y
Tursiops truncatus	Placental	RefSeq	KRAB-SSXRD-SET	XM_004318593.1	XP_004318641	PRDM9	NA	Y	Y	Y
Ursus maritimus	Placental	RefSeq	KRAB-SSXRD-SET	XM_008702823.1	XP_008701045	PRDM7	NA	Y	Y	Y
Vicugna pacos	Placental	RefSeq	KRAB-SSXRD-SET	XM_015246230.1	XP_015101716	PRDM7	NA	Y	Y	Y

## Sheet: 1B
Supplementary File 1B. PRDM9 orthologs identified from whole genome sequences, including accessions for the relevant contigs, which orthologs were used in their identification and in the construction of a gene model. E-values are given for the domains we identified in each PRDM9 ortholog.
										smart00349	pfam09514	smart00317
Species	Genome Source	Major cladde	Gene name	Structure	Transcript	Contigs/Accession	Query Sequence	Arrangement	Genewise Species	KRAB evalue	SSXRD evalue	SET evalue
Anguilla anguilla	NCBI	Bony fish	AA1	KRAB-SSXRD-SET	Locus_15790	AZBK01624676,AZBK01624677,AZBK01624678,AZBK01484799,AZBK01624679,AZBK01624680	Homo sapiens (PRDM9)	support from transcript, scaffold	Homo sapiens	1.11e-05	109	3.6e-07
Anguilla japonica	NCBI	Bony fish	AJ1	SSXRD-SET	NA	AVPY01287062	Anguilla anguilla (AA1)	single scaffold	Homo sapiens	NA	21	1.67e-10
Anguilla rostrata	NCBI	Bony fish	AR2	KRAB-SSXRD-SET	NA	LTYT01002562	Anguilla anguilla (AA1)	single scaffold	Homo sapiens	1.63e-05	67;91	1.09e-10
Anguilla rostrata	NCBI	Bony fish	AR1	KRAB-SSXRD-SET	NA	LTYT01003501	Anguilla anguilla (AA1)	single scaffold	Homo sapiens	1.42e-05	65;88	2.05e-10
Anguilla rostrata	NCBI	Bony fish	AR3	SET	NA	LTYT01004818	Homo sapiens (PRDM9)	single scaffold	Homo sapiens	NA	NA	5.58e-11
Anguilla rostrata	NCBI	Bony fish	AR5	SET	NA	LTYT01023031	Homo sapiens (PRDM9)	single scaffold	Homo sapiens	NA	NA	2.14e-10
Apalone spinifera	NCBI	Turtles	AS1	KRAB-SSXRD-SET	NA	APJP01599555,APJP01307155,APJP01754501,APJP01584553	Chelonia mydas (PRDM9)	unsupported arrangement (single ortholog found)	Chelonia mydas	6.08e-08	1.26e-05	1.28e-08
Boa constrictor	http://gigadb.org/dataset/100060	Snakes	BC1	KRAB-SSXRD-SET	NA	scaffold-1290	Homo sapiens (PRDM9)	single scaffold	Homo sapiens	6.01e-07	0.00031	4.08e-05
Callorhinchus Millii	NCBI	Cartilaginous fish	CM1	KRAB-SET	NA	AAVX02040825,AAVX02040826	Homo sapiens (PRDM9)	single scaffold	Homo sapiens	0.2	NA	0.00323
Callorhinchus Millii	NCBI	Cartilaginous fish	CM2	KRAB-SET	NA	AAVX02043025	Callorhinchus millii (CM1)	single scaffold	Homo sapiens	0.08	NA	0.05
Crotalus horridus	NCBI	Snakes	CH1	KRAB-SSXRD-SET	NA	LVCR01079341,LVCR01033411	Boa constrictor (BC1)	unsupported arrangement (single ortholog found)	Boa constrictor	1.24e-07	0.00027	1.07e-05
Crotalus mitchelli	NCBI	Snakes	CRM1	KRAB-SSXRD-SET	NA	JPMF01002428,JPMF01170461,JPMF01162046,JPMF01471734,JPMF01422528,JPMF01290850,JPMF01112669,JPMF01241214	Boa constrictor (BC1)	unsupported arrangement (single ortholog found)	Boa constrictor	3.16e-07	0.000241	1.1
Cyprinus carpio	NCBI	Bony fish	CC1	SET	NA	LHQP01016450	Homo sapiens (PRDM9)	single scaffold	Homo sapiens	NA	NA	0.000325
Cyprinus carpio	NCBI	Bony fish	CC2	SET	NA	LHQP01014856	Homo sapiens (PRDM9)	single scaffold	Homo sapiens	NA	NA	0.000118
Deinagkistrodon acutus	http://gigadb.org/dataset/100196	Snakes	DA1	KRAB-SSXRD-SET	NA	scaffold404	Boa constrictor (BC1)	single scaffold	Boa constrictor	6.63e-06	0.00038	1.17e-05
Esox lucius	NCBI	Bony fish	EL1	SET	Locus_3683	AZJR02001573	Homo sapiens (PRDM9)	single scaffold	Homo sapiens	NA	NA	0.00221
Eublepharis macularius	http://gigadb.org/dataset/100246	Lizards	EM1	KRAB-SSXRD-SET	NA	scaffold1575	Pogona vitticeps (PV1)	single scaffold	Pogona viticeps	4.17e-09	8.65e-05	8.14e-07
Gadus morhua	NCBI	Bony fish	GM2	SET	Locus_8486	CAEA020001281	Homo sapiens (PRDM9)	single scaffold	Homo sapiens	NA	NA	3.15e-05
Gadus morhua	NCBI	Bony fish	GM1	SET	Locus_164	CAEA020014035	Homo sapiens (PRDM9)	single scaffold	Homo sapiens	NA	NA	3.31e-06
Gekko japonicus	NCBI	Lizards	GJ1	KRAB-SSXRD-SET	NA	LNDG01065447,LNDG01140945,LNDG01140947,LNDG01151342	Pogona vitticeps (PV1)	unsupported arrangement (single ortholog found)	Pogona viticeps	6.48e-11	0.002	0.00829
Ictalurus punctatus	NCBI	Bony fish	IP2	SET	Locus_7020	LBML01008540	Homo sapiens (PRDM9)	single scaffold	Homo sapiens	NA	NA	7.73e-09
Ictalurus punctatus	NCBI	Bony fish	IP10	SET	NA	LBML01016145	Homo sapiens (PRDM9)	single scaffold	Homo sapiens	NA	NA	5.48e-12
Lethenteron camtschaticum	NCBI	Jawless fish	LC1	SSXRD-SET	NA	APJL01116581,APJL01163597	Petromyzon marinus (PM1)	unsupported arrangement (single ortholog found)	Petromyzon marinus (transcript)	NA	0.000259	4.1e-07
Macropus eugenii	NCBI	Marsupial mammals	ME1	KRAB-SSXRD-SET	NA	ABQO020687710,ABQO020632161,ABQO020349624,ABQO020440802,ABQO020902656	Monodelphis domestica (MD1)	unsupported arrangement (single ortholog found)	Homo sapiens	1.14e-08	2.88e-13	0.06
Monodelphis domestica	NCBI	Marsupial mammals	MD1	KRAB-SSXRD-SET	NA	AAFR03059810,AAFR03059811	Homo sapiens (PRDM9)	single scaffold	Homo sapiens	8.55e-09	4.41e-13	1.92e-08
Ophiophagus hannah	NCBI	Snakes	OH1	KRAB-SSXRD-SET	NA	AZIM01002628	Boa constrictor (BC1)	single scaffold	Boa constrictor	5.06e-08	0.000957	0.000172
Ophiosaurus gracilis	http://gigadb.org/dataset/100119	Lizards	OG1	KRAB-SSXRD-SET	NA	scaffold1294	Pogona vitticeps (PV1)	single scaffold	Pogona viticeps	1.18e-08	7.44e-05	1.21e-05
Ornithorhynchus anatinus	NCBI	Monotremata	OA2	SET	Locus_5589	AAPN01004103,AAPN01004104,AAPN01306292,AAPN01306293	Homo sapiens (PRDM9)	support from transcript, scaffold	Homo sapiens	NA	NA	4.39e-07
Ornithorhynchus anatinus	NCBI	Monotremata	OA1	SSXRD-SET	Locus_44459	AAPN01250772:AAPN01250776	Homo sapiens (PRDM9)	single scaffold	Homo sapiens	NA	0.45	1.39e-08
Pantherophis guttaris	NCBI	Snakes	PG1	KRAB-SSXRD-SET	NA	JTLQ01150919,JTLQ01457650,JTLQ01129783,JTLQ01097360	Homo sapiens (PRDM9)	unsupported arrangement (single ortholog found)	Boa constrictor	2.1e-06	0.000682	0.000113
Petromyzon marinus	NCBI	Jawless fish	PM3	KRAB-SSXRD-SET	Locus_149	AEFG01039144	Homo sapiens (PRDM9)	single scaffold	Petromyzon marinus (transcript)	0.00118	0.00205	7.26e-14
Petromyzon marinus	NCBI	Jawless fish	PM1	KRAB-SSXRD-SET	Locus_149	AEFG01042909	Homo sapiens (PRDM9)	single scaffold	Petromyzon marinus (transcript)	0.000701	0.00291	6.02e-12
Petromyzon marinus	NCBI	Jawless fish	PM2	KRAB-SSXRD-SET	Locus_149	AEFG01048530	Homo sapiens (PRDM9)	single scaffold	Petromyzon marinus (transcript)	0.000705	0.00539	8.39e-14
Petromyzon marinus	NCBI	Jawless fish	PM5	KRAB-SSXRD-SET	Locus_149	AEFG01069653	Homo sapiens (PRDM9)	single scaffold	Petromyzon marinus (transcript)	0.00114	0.00198	1.15e-13
Petromyzon marinus	NCBI	Jawless fish	PM4	KRAB-SSXRD-SET	Locus_149	AEFG01069898	Homo sapiens (PRDM9)	single scaffold	Petromyzon marinus (transcript)	0.00113	0.00197	6.56e-14
Pogona vitticeps	http://gigadb.org/dataset/100166	Lizards	PV1	KRAB-SSXRD-SET	Locus_10728	scf000489:238,782..252,271	Homo sapiens (PRDM9)	single scaffold	Homo sapiens	7.67e-10	7.21e-05	3.77e-06
Rhincodon Typus	NCBI	Cartilaginous fish	RT1	KRAB-SSXRD-SET	NA	LVEK01784315,LVEK01985499	Callorhinchus millii (CM1)	unsupported arrangement (single ortholog found)	Callorhinchus millii	4.4e-10	103	3.62e-11
Scleropages formosus	NCBI	Bony fish	SF2	SET	NA	JARO02016308	Homo sapiens (PRDM9)	single scaffold	Homo sapiens	NA	NA	2.64e-13
Scleropages formosus	NCBI	Bony fish	SF3	SET	NA	JARO02019532	Homo sapiens (PRDM9)	single scaffold	Homo sapiens	NA	NA	1.31e-13
Scleropages formosus	NCBI	Bony fish	SF4	SET	NA	JARO02005742	Homo sapiens (PRDM9)	single scaffold	Homo sapiens	NA	NA	5.46e-12
Squalius pyrenaicus	NCBI	Bony fish	SP1	SET	NA	CVRK01019629	Homo sapiens (PRDM9)	single scaffold	Homo sapiens	NA	NA	0.0044
Squalius pyrenaicus	NCBI	Bony fish	SP2	SET	NA	CVRK01004779	Homo sapiens (PRDM9)	single scaffold	Homo sapiens	NA	NA	0.00378
Thamnophis sirtalis	NCBI	Snakes	TS1	KRAB-SSXRD-SET	NA	LFLD01148136,LFLD01168102	Boa constrictor (BC1)	unsupported arrangement (single ortholog found)	Boa constrictor	3.55e-08	0.00106	8.39e-05
Vipera berus	NCBI	Snakes	VB1	KRAB-SET	NA	JTGP01242700,JTGP01033731:JTGP01033735,JTGP01033742	Boa constrictor (BC1)	unsupported arrangement (single ortholog found)	Boa constrictor	0.04	NA	0.000112
