# Supplementary material for: Repeated losses of PRDM9-directed recombination despite the conservation of PRDM9 across vertebrates
Source: eLife. 2017 Jun 6;6:e24133. doi: 10.7554/eLife.24133 (PMC5519329; doi:10.7554/eLife.24133)
Supplement: Supplementary file 2. — N50 describes the shortest contig length in which 50% of the assembled transcriptome is contained. (B) Summary of expression results of PRDM9 in the testis in representative species from major taxa. Only species that passed the core recombination protein quality test (see Materials and methods, Supplementary file 2D) are included in this table, with the exception of cases, indicated with asterisks, in which PRDM9 was detected but one or more conserved recombination proteins were not. (C) Results of a rpsblast search of assembled transcriptomes and a reciprocal best blast test to PRMD9. Domain structures found in transcripts that blasted to PRDM9 for each species are also listed. (D) Results of the core recombination protein test for each species for which a transcriptome was assembled. Blue shading indicates that a reciprocal best blast test did not identify the gene in the transcriptome. DOI: http://dx.doi.org/10.7554/eLife.24133.023 [file elife-24133-supp2.xlsx]

## Sheet: 2A
Supplementary File 2A. Accession numbers and assembly descriptions of publicly available testes RNAseq samples used for de novo assembly and assessment of PRDM9 expression. N50 describes is shortest contig in which 50% of the assembly is contained.
Species (common name)	SRA Accession	Number of sequences assembled	Assembly N50 (bp)
Ambystoma mexicanum (Mexican salamander)	SRR2885289	65430	1646
Anguilla anguilla (European eel)	SRR1532765	204457	2305
Astyanax mexicanus (Mexican tetra)	SRR2045409	132268	2648
Brevoortia tyrannus (Atlantic Menhaden)	SRR1820331	208748	1359
Callorhinchus milii (elephant shark)	SRR513757	265956	812
Cynops pyrrhogaster (Japanese fire belly newt)	SRR1553344	163230	1926
Danio rerio (zebrafish)	SRR1524249	194569	2354
Esox lucius (pike)	SRR1533661	137688	2724
Gadus morhua (cod)	SRR2045424	78280	1966
Ictalurus punctatus* (Channel catfish)	SRR653303	275791	856
Latimeria menadoensis (Indonesian coelacanth)	SRR576101	94325	984
Lepisosteus oculatus (spotted gar)	SRR1524260	144631	3076
Macropus eugenii (Tammar wallaby)	DRR013676	110948	1592
Monodelphis domestica (gray short-tailed opossum)	SRR649379; SRR649380	178722	699
Mus musculus (mouse)	SRR306775	49230	1316
Ornithorhynchus anatinus (platypus)	SRR649383; SRR649384	136099	880
Osteoglossum bircirrhosum (Silver Arowana)	SRR1532797	202437	2839
Petromyzon marinus (sea lamprey)	SRR369904	124994	1048
Phascolarctos cinereus (Koala)	SRR1207975	481174	1227
Pogona vitticeps (bearded dragon)	ERR413070	147543	1279
Salmo salar* (Salmon)	SRR1422872	237736	1699
Salmo trutta (brown trout)	SRR1532786	301091	2606
Xenopus tropicalis (western clawed frog)	SRR649399; SRR943353	116,163; 103,312	795; 2,304
Xiphophorus birchmanni and X. malinche (lowland and highland swordtail)	This study (SRX2436594; SRX2436597)	64607	2423
* For assembly, channel catfish data and salmon data were downsampled to 15% and 20% of the original number of reads, respectively.

## Sheet: 2B
Supplementary File 2B. Summary of expression results of PRDM9 in the testis in representative species from major clades. Only species that passed the core recombination protein quality test (see Methods, Supplementary File 2C) are included in this table, with the exception of cases, indicated with asterisks, where PRDM9 was detected but one or more conserved recombination proteins were not.
Species	Major group	PRDM9 expression detected (Y/N)
Ambystoma mexicanum (Mexican salamander)	Amphibian	N
Anguilla anguilla (European eel)	Teleost fish – with PRDM9α and PRDM9β	Y (PRDM9α)
Astyanax mexicanus (Mexican tetra)	Teleost fish – with PRDM9α and PRDM9β	Y (both)
Brevoortia tyrannus (Atlantic menhaden)	Teleost fish – with PRDM9α and PRDM9β	Y (PRDM9α)
Callorhinchus milii (Elephant shark)	Cartilaginous fish	N
Cynops pyrrhogaster (Japanese fire belly newt)	Amphibian	N
Danio rerio (zebrafish)	Teleost fish – with PRDM9β	Y
Esox lucius (pike)*	Teleost fish – with PRDM9α and PRDM9β	Y (multiple)
Gadus morhua (cod)	Teleost fish – with PRDM9α and PRDM9β	Y (multiple)
Ictalurus punctatus (Channel catfish)	Teleost fish – with PRDM9α and PRDM9β	Y (PRDM9α)
Latimeria menadoensis (Indonesian coelacanth)	Coelacanth	Y
Lepisosteus oculatus (spotted gar)	Holostei fish	Y (multiple)
Macropus eugenii (Tamar wallaby)	Marsupial	Y
Mus musculus (mouse)	Mammal	Y
Monodelphis domestica (opossum)	Marsupial	Y
Ornithorhynchus anatinus (platypus)	Monotreme	N
Osteoglossum bicirrhosum (silver arowana)	Teleost fish – with PRDM9β	Y
Petromyzon marinus (sea lamprey)*	Jawless fish	Y
Phascolarctos cinereus (Koala)	Marsupial	Y
Pogona vitticeps (bearded dragon)	Lizard	Y
Salmo salar (Atlantic salmon)	Teleost fish – with PRDM9α and PRDM9β	Y (multiple)
Salmo trutta (brown trout)	Teleost fish – with PRDM9α and PRDM9β	Y (both)
Xenopus tropicalis (western clawed frog)	Amphibian	N
Xiphophorus birchmanni (lowland swordtail)	Teleost fish – with PRDM9β	Y

## Sheet: 2C
Supplementary File 2C. Results of rpsblast search of assembled transcriptomes and reciprocal best blast test to PRMD9. Domain structures found in transcripts that blasted to PRDM9 for each species are also listed.
Species	Passed core recombination quality test? (Y/N)	Transcript ID	KRAB.domain.e.value	SSXRD.domain.e.value	SET.domain.e.value	KRAB.domain.coordinate.start	KRAB.domain.coordinate.stop	SSXRD.domain.coordinate.start	SSXRD.domain.coordinate.stop	SET.domain.coordinate.start	SET.domain.coordinate.stop
Astyanax mexicanus	Y	Locus_12285_Transcript_2/10_Confidence_0.387_Length_3469_fr1	NA	NA	3e-08	NA	NA	NA	NA	221	321
Astyanax mexicanus	Y	Locus_12285_Transcript_4/10_Confidence_0.274_Length_2663	NA	NA	2e-08	NA	NA	NA	NA	188	288
Astyanax mexicanus	Y	Locus_12285_Transcript_8/10_Confidence_0.387_Length_2666	NA	NA	2e-08	NA	NA	NA	NA	188	288
Astyanax mexicanus	Y	Locus_12285_Transcript_6/10_Confidence_0.323_Length_2664	NA	NA	2e-08	NA	NA	NA	NA	188	288
Astyanax mexicanus	Y	Locus_12285_Transcript_10/10_Confidence_0.387_Length_3371	NA	NA	2e-08	NA	NA	NA	NA	188	288
Astyanax mexicanus	Y	Locus_12285_Transcript_9/10_Confidence_0.371_Length_3373	NA	NA	3e-08	NA	NA	NA	NA	188	288
Astyanax mexicanus	Y	Locus_12285_Transcript_3/10_Confidence_0.371_Length_3428	NA	NA	2e-08	NA	NA	NA	NA	207	307
Astyanax mexicanus	Y	Locus_1939_Transcript_3/3_Confidence_0.600_Length_3670	NA	NA	1e-05	NA	NA	NA	NA	383	436
Astyanax mexicanus	Y	Locus_1939_Transcript_2/3_Confidence_0.400_Length_3764	NA	NA	1e-05	NA	NA	NA	NA	414	467
Pogona vitticeps	Y	Locus_10728_Transcript_3/4_Confidence_0.727_Length_1638	2e-05	0.008	NA	270	305	423	453	NA	NA
Pogona vitticeps	Y	Locus_13762_Transcript_1/1_Confidence_1.000_Length_750	NA	NA	6e-06	NA	NA	NA	NA	10	64
Pogona vitticeps	Y	Locus_10728_Transcript_4/4_Confidence_0.727_Length_1624	2e-05	0.015	NA	265	300	18	448	NA	NA
Salmo trutta	Y	Locus_1800_Transcript_8/8_Confidence_0.705_Length_2033	26	NA	NA	60	82	NA	NA	NA	NA
Salmo trutta	Y	Locus_1800_Transcript_5/8_Confidence_0.705_Length_2033	26	NA	NA	60	82	NA	NA	NA	NA
Salmo trutta	Y	Locus_1800_Transcript_7/8_Confidence_0.682_Length_2300	30	NA	NA	60	82	NA	NA	NA	NA
Salmo trutta	Y	Locus_1800_Transcript_1/8_Confidence_0.705_Length_2016	31	NA	1e-07	60	82	NA	NA	461	545
Salmo trutta	Y	Locus_1800_Transcript_4/8_Confidence_0.705_Length_2033	26	NA	NA	60	82	NA	NA	NA	NA
Salmo trutta	Y	Locus_5837_Transcript_2/5_Confidence_0.636_Length_1638	3.3	16	9e-10	12	37	56	173	302	417
Salmo trutta	Y	Locus_5837_Transcript_5/5_Confidence_0.818_Length_1722	3.5	15	1e-09	12	37	238	255	302	417
Salmo trutta	Y	Locus_5837_Transcript_3/5_Confidence_0.682_Length_1475	NA	8	1e-09	NA	NA	156	173	220	335
Salmo trutta	Y	Locus_1375_Transcript_7/12_Confidence_0.605_Length_2945	NA	NA	0.002	NA	NA	NA	NA	218	270
Salmo trutta	Y	Locus_1375_Transcript_6/12_Confidence_0.605_Length_3458	NA	NA	7e-05	NA	NA	NA	NA	218	270
Salmo trutta	Y	Locus_1375_Transcript_10/12_Confidence_0.500_Length_3215	NA	NA	0.002	NA	NA	NA	NA	218	270
Salmo trutta	Y	Locus_1375_Transcript_12/12_Confidence_0.605_Length_3458	NA	NA	0.002	NA	NA	NA	NA	218	270
Salmo trutta	Y	Locus_1375_Transcript_9/12_Confidence_0.605_Length_3458	NA	NA	0.002	NA	NA	NA	NA	218	270
Salmo trutta	Y	Locus_1375_Transcript_8/12_Confidence_0.605_Length_3458	NA	NA	0.002	NA	NA	NA	NA	218	270
Salmo trutta	Y	Locus_1375_Transcript_11/12_Confidence_0.605_Length_3467	NA	NA	0.002	NA	NA	NA	NA	218	270
Salmo trutta	Y	Locus_1375_Transcript_3/12_Confidence_0.553_Length_3106	NA	NA	0.002	NA	NA	NA	NA	100	152
Salmo trutta	Y	Locus_1800_Transcript_2/8_Confidence_0.386_Length_1607	NA	NA	1e-07	NA	NA	NA	NA	323	407
Salmo trutta	Y	Locus_1800_Transcript_3/8_Confidence_0.386_Length_1604	NA	NA	1e-07	NA	NA	NA	NA	324	408
Salmo trutta	Y	Locus_5837_Transcript_3/5_Confidence_0.682_Length_1475	NA	NA	4e-08	NA	NA	NA	NA	247	331
Latimeria menadoensis	Y	Locus_428_Transcript_5/5_Confidence_0.700_Length_2337	1e-08	0.017	6e-07	236	272	432	460	547	617
Latimeria menadoensis	Y	Locus_428_Transcript_2/5_Confidence_0.500_Length_2001	1e-08	0.017	6e-07	236	272	432	460	547	617
Latimeria menadoensis	Y	Locus_428_Transcript_1/5_Confidence_0.200_Length_1030	2e-09	NA	NA	NA	NA	NA	NA	236	272
Anguilla anguilla	Y	Locus_15790_Transcript_4/8_Confidence_0.600_Length_2211	0.15	NA	NA	197	233	NA	NA	198	289
Anguilla anguilla	Y	Locus_15790_Transcript_5/8_Confidence_0.550_Length_3029	0.31	NA	0.016	197	233	NA	NA	936	1009
Anguilla anguilla	Y	Locus_15790_Transcript_8/8_Confidence_0.600_Length_3651	0.26	NA	NA	197	233	NA	NA	NA	NA
Anguilla anguilla	Y	Locus_15790_Transcript_1/8_Confidence_0.550_Length_3651	0.26	NA	NA	197	233	NA	NA	NA	NA
Anguilla anguilla	Y	Locus_15790_Transcript_2/8_Confidence_0.500_Length_3002	NA	NA	7.2	NA	NA	NA	NA	984	1000
Anguilla anguilla	Y	Locus_15790_Transcript_4/8_Confidence_0.600_Length_2211	NA	NA	5.2	NA	NA	NA	NA	720	736
Anguilla anguilla	Y	Locus_15790_Transcript_8/8_Confidence_0.600_Length_3651	NA	NA	8.9	NA	NA	NA	NA	1200	1216
Anguilla anguilla	Y	Locus_15790_Transcript_1/8_Confidence_0.550_Length_3651	NA	NA	8.9	NA	NA	NA	NA	1200	1216
Anguilla anguilla	Y	Locus_13424_Transcript_2/2_Confidence_0.923_Length_713	NA	NA	3e-08	NA	NA	NA	NA	20	74
Monodelphis domestica	Y	Locus_69973_Transcript_1/1_Confidence_1.000_Length_142	NA	NA	0.26	NA	NA	NA	NA	1	17
Salmo salar	Y	Locus_1436_Transcript_10/16_Confidence_0.243_Length_2861	6.1	NA	5e-08	142	167	NA	NA	459	543
Salmo salar	Y	Locus_1436_Transcript_15/16_Confidence_0.196_Length_2317	5.1	NA	3e-08	142	167	NA	NA	459	543
Salmo salar	Y	Locus_1436_Transcript_9/16_Confidence_0.155_Length_2297	NA	NA	3e-08	NA	NA	NA	NA	271	355
Salmo salar	Y	Locus_30430_Transcript_1/3_Confidence_0.500_Length_596	NA	NA	5e-07	NA	NA	NA	NA	14	71
Salmo salar	Y	Locus_30430_Transcript_3/3_Confidence_0.750_Length_749	NA	NA	1e-06	NA	NA	NA	NA	14	71
Salmo salar	Y	Locus_30430_Transcript_2/3_Confidence_0.750_Length_773	NA	NA	1e-06	NA	NA	NA	NA	14	71
Salmo salar	Y	Locus_41218_Transcript_2/4_Confidence_0.600_Length_2034	NA	NA	0.012	NA	NA	NA	NA	1	51
Salmo salar	Y	Locus_41218_Transcript_4/4_Confidence_0.600_Length_2547	NA	NA	0.013	NA	NA	NA	NA	1	51
Salmo salar	Y	Locus_41218_Transcript_3/4_Confidence_0.700_Length_2603	NA	NA	0.014	NA	NA	NA	NA	1	51
Danio rerio	Y	Locus_13877_Transcript_1/1_Confidence_1.000_Length_2960	NA	NA	0.011	NA	NA	NA	NA	135	235
Esox lucius	N	Locus_3683_Transcript_3/3_Confidence_0.571_Length_2911	NA	NA	0.0002	NA	NA	NA	NA	114	197
Esox lucius	N	Locus_8038_Transcript_3/3_Confidence_0.538_Length_593	NA	NA	3e-07	NA	NA	NA	NA	10	64
Esox lucius	N	Locus_8038_Transcript_2/3_Confidence_0.615_Length_1184	NA	NA	9e-07	NA	NA	NA	NA	10	64
Esox lucius	N	Locus_3683_Transcript_1/3_Confidence_0.714_Length_2924	NA	NA	0.0002	NA	NA	NA	NA	118	201
Esox lucius	N	Locus_8038_Transcript_1/3_Confidence_0.462_Length_852	NA	NA	0.005	NA	NA	NA	NA	109	150
Esox lucius	N	Locus_288_Transcript_3/9_Confidence_0.367_Length_500	4.5	NA	NA	NA	NA	33	50	NA	NA
Esox lucius	N	Locus_288_Transcript_4/9_Confidence_0.233_Length_686	6.6	NA	NA	NA	NA	76	93	NA	NA
Esox lucius	N	Locus_288_Transcript_9/9_Confidence_0.367_Length_557	4.9	NA	NA	NA	NA	33	50	NA	NA
Esox lucius	N	Locus_288_Transcript_5/9_Confidence_0.400_Length_557	3.4	NA	NA	NA	NA	33	50	NA	NA
Esox lucius	N	Locus_288_Transcript_6/9_Confidence_0.367_Length_736	5.1	NA	NA	NA	NA	33	50	NA	NA
Esox lucius	N	Locus_288_Transcript_2/9_Confidence_0.400_Length_579	4.6	NA	NA	NA	NA	33	50	NA	NA
Xiphophorus birchmanni	Y	Locus_5816_Transcript_1/1_Confidence_1.000_Length_3498	NA	NA	0.001	NA	NA	NA	NA	208	260
Macropus eugenii	Y	Locus_540_Transcript_1/1_Confidence_1.000_Length_3633_fr4	9e-16	NA	NA	225	263	NA	NA	NA	NA
Macropus eugenii	Y	Locus_2262_Transcript_3/3_Confidence_0.786_Length_1834_fr6	6e-25	NA	NA	185	224	NA	NA	NA	NA
Macropus eugenii	Y	Locus_2262_Transcript_2/3_Confidence_0.143_Length_1833_fr6	6e-25	NA	NA	185	224	NA	NA	NA	NA
Macropus eugenii	Y	Locus_2262_Transcript_1/3_Confidence_0.214_Length_1884_fr6	7e-25	NA	NA	185	224	NA	NA	NA	NA
Brevoortia tyrannus	Y	Locus_1252_Transcript_20/24_Confidence_0.236_Length_2581_fr4	0.021	3.1	1e-11	61	92	285	304	350	465
Brevoortia tyrannus	Y	Locus_1252_Transcript_17/24_Confidence_0.253_Length_2593_fr4	0.17	35	1e-11	76	107	289	308	354	469
Brevoortia tyrannus	Y	Locus_1252_Transcript_16/24_Confidence_0.181_Length_1409_fr5	NA	NA	3e-07	NA	NA	NA	NA	16	70
Brevoortia tyrannus	Y	Locus_1252_Transcript_22/24_Confidence_0.286_Length_2241_fr6	NA	28	1e-11	NA	NA	166	185	231	346
Brevoortia tyrannus	Y	Locus_1252_Transcript_24/24_Confidence_0.286_Length_2226_fr6	NA	28	1e-11	NA	NA	166	185	231	346
Brevoortia tyrannus	Y	Locus_1252_Transcript_18/24_Confidence_0.198_Length_1500_fr6	NA	NA	0.001	NA	NA	NA	NA	55	100
Petromyzon marinus	N	Locus_149_Transcript_1/7_Confidence_0.542_Length_1474_fr1	NA	0.008	3e-13	NA	NA	188	208	262	369
Petromyzon marinus	N	Locus_149_Transcript_5/7_Confidence_0.500_Length_1541_fr2	0.93	0.011	5e-13	20	54	225	245	299	406
Petromyzon marinus	N	Locus_149_Transcript_4/7_Confidence_0.500_Length_1565_fr2	0.93	0.011	5e-13	20	54	225	245	299	406
Petromyzon marinus	N	Locus_149_Transcript_7/7_Confidence_0.542_Length_1586_fr2	0.93	0.011	5e-13	20	54	225	245	299	406
Petromyzon marinus	N	Locus_149_Transcript_6/7_Confidence_0.500_Length_1629_fr2	0.93	0.011	5e-13	20	54	225	245	299	406
Petromyzon marinus	N	Locus_149_Transcript_2/7_Confidence_0.542_Length_1431_fr2	0.93	0.011	5e-13	20	54	225	245	299	406
Phasocolarctos cinereus	Y	Locus_2211_Transcript_12/16_Confidence_0.312_Length_3138_fr1	0.089	6e-13	1e-06	65	100	213	242	288	405
Phasocolarctos cinereus	Y	Locus_2211_Transcript_10/16_Confidence_0.125_Length_1695_fr1	0.062	2e-12	3e-07	65	100	213	242	288	405
Phasocolarctos cinereus	Y	Locus_5388_Transcript_10/10_Confidence_0.353_Length_2244_fr2	6e-18	NA	NA	NA	NA	25	64	NA	NA
Phasocolarctos cinereus	Y	Locus_5388_Transcript_7/10_Confidence_0.382_Length_2742_fr2	9e-18	NA	NA	NA	NA	25	6	NA	NA
Phasocolarctos cinereus	Y	Locus_2211_Transcript_8/16_Confidence_0.312_Length_3380_fr3	0.072	4e-13	6e-07	145	180	293	322	368	485
Phasocolarctos cinereus	Y	Locus_2211_Transcript_16/16_Confidence_0.312_Length_3138_fr4	0.089	6e-13	1e-06	65	100	288	405	213	242
Phasocolarctos cinereus	Y	Locus_2211_Transcript_11/16_Confidence_0.125_Length_1695_fr4	0.062	2e-12	3e-07	65	100	213	242	288	405
Phasocolarctos cinereus	Y	Locus_2211_Transcript_7/16_Confidence_0.312_Length_3380_fr6	0.072	4e-13	6e-07	145	180	293	322	368	485
Lepisosteus oculatus	Y	Locus_826_Transcript_7/12_Confidence_0.375_Length_3176_fr1	0.018	21	2e-12	51	85	737	757	803	920
Lepisosteus oculatus	Y	Locus_6947_Transcript_5/5_Confidence_0.500_Length_7242_fr1	NA	NA	1e-07	NA	NA	NA	NA	2236	2335
Lepisosteus oculatus	Y	Locus_6947_Transcript_3/5_Confidence_0.553_Length_7242_fr1	NA	NA	2e-07	NA	NA	NA	NA	2236	2335
Lepisosteus oculatus	Y	Locus_11539_Transcript_7/10_Confidence_0.250_Length_604_fr1	NA	NA	0.055	NA	NA	NA	NA	149	199
Lepisosteus oculatus	Y	Locus_11539_Transcript_5/10_Confidence_0.250_Length_1072_fr1	NA	NA	0.009	NA	NA	NA	NA	282	351
Lepisosteus oculatus	Y	Locus_826_Transcript_11/12_Confidence_0.116_Length_414_fr1	0.005	NA	NA	51	85	NA	NA	NA	NA
Lepisosteus oculatus	Y	Locus_826_Transcript_10/12_Confidence_0.366_Length_3057_fr2	NA	16	2e-12	NA	NA	697	717	763	880
Lepisosteus oculatus	Y	Locus_11539_Transcript_8/10_Confidence_0.229_Length_935_fr2	NA	NA	0.08	NA	NA	NA	NA	259	309
Lepisosteus oculatus	Y	Locus_11539_Transcript_6/10_Confidence_0.229_Length_1644_fr2	NA	NA	2.4	NA	NA	NA	NA	37	62
Lepisosteus oculatus	Y	Locus_11539_Transcript_4/10_Confidence_0.188_Length_1155_fr2	NA	NA	1.6	NA	NA	NA	NA	37	62
Lepisosteus oculatus	Y	Locus_11539_Transcript_9/10_Confidence_0.479_Length_2713_fr2	NA	NA	4.2	NA	NA	NA	NA	37	62
Lepisosteus oculatus	Y	Locus_826_Transcript_4/12_Confidence_0.330_Length_1840_fr3	NA	17	8e-13	NA	NA	291	311	357	474
Lepisosteus oculatus	Y	Locus_6947_Transcript_2/5_Confidence_0.368_Length_7244_fr3	NA	NA	4e-08	NA	NA	NA	NA	2236	2340
Lepisosteus oculatus	Y	Locus_826_Transcript_3/12_Confidence_0.241_Length_736_fr3	NA	NA	0.0001	NA	NA	NA	NA	59	100
Lepisosteus oculatus	Y	Locus_826_Transcript_12/12_Confidence_0.241_Length_736_fr3	NA	NA	0.0001	NA	NA	NA	NA	59	100
Lepisosteus oculatus	Y	Locus_826_Transcript_6/12_Confidence_0.223_Length_434_fr3	NA	NA	4e-05	NA	NA	NA	NA	59	100
Lepisosteus oculatus	Y	Locus_826_Transcript_5/12_Confidence_0.223_Length_419_fr3	NA	NA	5e-05	NA	NA	NA	NA	59	100
Ictalurus punctatus	Y	Locus_1123_Transcript_14/15_Confidence_0.278_Length_2181_fr1	NA	NA	9e-12	NA	NA	NA	NA	147	265
Ictalurus punctatus	Y	Locus_7020_Transcript_7/9_Confidence_0.367_Length_1644_fr1	NA	NA	2e-09	NA	NA	NA	NA	192	292
Ictalurus punctatus	Y	Locus_7020_Transcript_8/9_Confidence_0.133_Length_1455_fr1	NA	NA	2e-09	NA	NA	NA	NA	192	292
Ictalurus punctatus	Y	Locus_7020_Transcript_2/9_Confidence_0.500_Length_1961_fr1	NA	NA	2e-09	NA	NA	NA	NA	192	292
Ictalurus punctatus	Y	Locus_7020_Transcript_3/9_Confidence_0.533_Length_1975_fr1	NA	NA	2e-09	NA	NA	NA	NA	180	280
Ictalurus punctatus	Y	Locus_7020_Transcript_9/9_Confidence_0.533_Length_2011_fr1	NA	NA	2e-09	NA	NA	NA	NA	192	292
Ictalurus punctatus	Y	Locus_7020_Transcript_1/9_Confidence_0.200_Length_1030_fr1	NA	NA	3e-09	NA	NA	NA	NA	192	292
Ictalurus punctatus	Y	Locus_7020_Transcript_6/9_Confidence_0.167_Length_1139_fr1	NA	NA	3e-09	NA	NA	NA	NA	192	292
Ictalurus punctatus	Y	Locus_2594_Transcript_12/12_Confidence_0.423_Length_1591_fr2	NA	NA	1e-10	NA	NA	NA	NA	191	306
Ictalurus punctatus	Y	Locus_2594_Transcript_9/12_Confidence_0.380_Length_1596_fr2	NA	NA	1e-10	NA	NA	NA	NA	191	306
Ictalurus punctatus	Y	Locus_2594_Transcript_10/12_Confidence_0.380_Length_1620_fr2	NA	NA	2e-10	NA	NA	NA	NA	191	306
Ictalurus punctatus	Y	Locus_2594_Transcript_7/12_Confidence_0.423_Length_1600_fr2	NA	NA	2e-10	NA	NA	NA	NA	194	309
Ictalurus punctatus	Y	Locus_2594_Transcript_3/12_Confidence_0.423_Length_1591_fr2	NA	NA	2e-10	NA	NA	NA	NA	191	306
Ictalurus punctatus	Y	Locus_2594_Transcript_8/12_Confidence_0.352_Length_1793_fr3	NA	NA	8e-11	NA	NA	NA	NA	258	373
Ictalurus punctatus	Y	Locus_2586_Transcript_6/12_Confidence_0.202_Length_2837_fr3	NA	NA	3e-09	NA	NA	NA	NA	662	780
Ictalurus punctatus	Y	Locus_7020_Transcript_5/9_Confidence_0.533_Length_2046_fr3	NA	NA	1e-09	NA	NA	NA	NA	203	303
Ictalurus punctatus	Y	Locus_2586_Transcript_4/12_Confidence_0.393_Length_3201_fr3	NA	NA	2e-10	NA	NA	NA	NA	673	773
Ictalurus punctatus	Y	Locus_1123_Transcript_7/15_Confidence_0.300_Length_1832_fr3	NA	NA	2e-10	NA	NA	NA	NA	30	148
Ictalurus punctatus	Y	Locus_27439_Transcript_2/2_Confidence_0.938_Length_1087_fr5	NA	NA	2e-07	NA	NA	NA	NA	166	286
Ictalurus punctatus	Y	Locus_27439_Transcript_1/2_Confidence_0.812_Length_740_fr6	NA	NA	1e-07	NA	NA	NA	NA	50	170
Osteoglossum bicirrhosum	Y	Locus_17337_Transcript_3/4_Confidence_0.625_Length_2461_fr2	NA	NA	1e-10	NA	NA	NA	NA	167	283
Osteoglossum bicirrhosum	Y	Locus_17337_Transcript_4/4_Confidence_0.625_Length_3493_fr2	NA	NA	2e-10	NA	NA	NA	NA	167	283
Osteoglossum bicirrhosum	Y	Locus_17337_Transcript_1/4_Confidence_0.500_Length_3257_fr3	NA	NA	2e-10	NA	NA	NA	NA	88	204
Osteoglossum bicirrhosum	Y	Locus_17337_Transcript_2/4_Confidence_0.375_Length_3536_fr3	NA	NA	2e-10	NA	NA	NA	NA	181	297
Gadus morhua	Y	Locus_164_Transcript_26/28_Confidence_0.284_Length_1274_fr4	NA	NA	0.0002	NA	NA	NA	NA	150	267
Gadus morhua	Y	Locus_8486_Transcript_2/2_Confidence_0.833_Length_3798_fr4	NA	NA	6e-05	NA	NA	NA	NA	215	323
Gadus morhua	Y	Locus_164_Transcript_21/28_Confidence_0.284_Length_1300_fr6	NA	NA	0.0002	NA	NA	NA	NA	161	278
Gadus morhua	Y	Locus_164_Transcript_23/28_Confidence_0.236_Length_1250_fr6	NA	NA	0.0004	NA	NA	NA	NA	161	278
Gadus morhua	Y	Locus_164_Transcript_28/28_Confidence_0.284_Length_1309_fr6	NA	NA	0.0003	NA	NA	NA	NA	161	278
Gadus morhua	Y	Locus_164_Transcript_20/28_Confidence_0.277_Length_1323_fr6	NA	NA	0.0003	NA	NA	NA	NA	161	278
Gadus morhua	Y	Locus_164_Transcript_27/28_Confidence_0.270_Length_1334_fr6	NA	NA	0.0004	NA	NA	NA	NA	161	278
Gadus morhua	Y	Locus_164_Transcript_19/28_Confidence_0.270_Length_1240_fr6	NA	NA	0.0002	NA	NA	NA	NA	138	255
Gadus morhua	Y	Locus_164_Transcript_25/28_Confidence_0.284_Length_1273_fr6	NA	NA	0.0002	NA	NA	NA	NA	161	278
Ornithorhynchus anatinus	Y	Locus_44459_Transcript_1/1_Confidence_1.000_Length_344	NA	NA	0.18	NA	NA	NA	NA	46	108
Ornithorhynchus anatinus	Y	Locus_5589_Transcript_1/1_Confidence_1.000_Length_999	NA	NA	5e-08	NA	NA	NA	NA	243	328

## Sheet: 2D
Supplementary File 2D. Results of the core recombination protein test for each species for which a transcriptome was assembled. Blue shading indicates that a reciprocal best blast test did not identify the gene in the transcriptome.
Species	HORMAD1 (NP_001186758.1)	MEI4 (NP_001269065.1)	MRE11 (EAW66934.1)	NBS1 (BAA28616.1)	RAD50 (AAB07119.1)	SPO11 (AAD52562.1)	REC114 (NP_001035826.1)
Astyanax mexicanus	x	x	x	x	x	x	x
Pogona vitticeps	x	x	x	x	x	x	x
Salmo trutta	x	x	x	x	x	x	x
Callorhinchus milii	x	x	x	x	x	x	x
Latimeria menadoensis	x	x	x	x	x	x	x
Anguilla anguilla	x	x	x	x	x	x	x
Cynops pyrrhogaster	x	x	x	x	x	x	x
Monodelphis domestica	x	x	x	x	x	x	x
Ornithorhynchus anatinus	x	x	x	x	x	x	x
Salmo salar	x	x	x	x	x	x	x
Xenopus tropicalis	x	x	x	x	x	x	x
Danio rerio	x	x	x	x	x	x	x
Esox lucius	x	x	x	x	x		x
Xiphophorus birchmanni	x	x	x	x	x	x	x
Macropus eugenii	x	x	x	x	x	x	x
Brevoortia tyrannus	x	x	x	x	x	x	x
Petromyzon marinus	x		x	x	x	x	x
Phasocolarctos cinereus	x	x	x	x	x	x	x
Ambystoma mexicanum	x	x	x	x	x	x	x
Lepisosteus oculatus	x	x	x	x	x	x	x
Osteoglossum bicirrhosum	x	x	x	x	x	x	x
Ictalurus punctatus	x	x	x	x	x	x	x
Gadus morhua	x	x	x	x	x	x	x
