# Supplementary material for: Repeated losses of PRDM9-directed recombination despite the conservation of PRDM9 across vertebrates
Source: eLife. 2017 Jun 6;6:e24133. doi: 10.7554/eLife.24133 (PMC5519329; doi:10.7554/eLife.24133)
Supplement: Supplementary file 3. — To determine whether PRDM9 orthologs lacking functional domains are non-functional, we compared rates of evolution between each PRDM9 ortholog missing a domain and another sequence (listed here) with the complete domain structure. The number of aligned bases and the results of a likelihood ratio test of non-neutral versus neutral evolution are also shown. See Methods for details. (B) Amino acid diversity levels of PRDM9 ZF arrays and the proportion localized to known DNA-binding residues. Columns labeled V1-V28 indicate the amount of amino acid diversity observed at each amino acid in the ZF array. For each gene, we also report the ranking of this proportion relative to all other C2H2 ZF genes from the same species, when such a ranking was feasible. This table additionally includes the average percent DNA identity between ZFs used in our analysis of rapid evolution. (C) Results of the likelihood ratio test of neutral versus not non-neutral evolution along the SET domain of mammalian PRDM9 orthologs lacking a KRAB or SSXRD domain, as annotated in RefSeq (see Materials and methods). We also indicate whether another annotated ortholog exists with a KRAB domain. DOI: http://dx.doi.org/10.7554/eLife.24133.024 [file elife-24133-supp3.xlsx]

## Sheet: 3A
Supplementary File 3A. Rates of amino acid evolution in SET domains of representative PRDM9 orthologs lacking other functional domains. To determine whether PRDM9 orthologs lacking functional domains are non-functional, we compared rates of evolution between each PRDM9 ortholog missing a domain and another sequence (listed here) with the complete domain structure. The number of aligned bases and …
Focal species (common name)	Aligned species	Number of aligned base pairs	dN/dS	Likelihood difference (p-value)
Ornithorhynchus anatinus (platypus)	Human	348	0.14	23 (2.5e-11)
Sarcophilus harrisii (Tasmanian devil)	Human	354	0.06	46 (<1e-10)
Xiphophorus maculatus PRDM9b (southern platyfish)	Astyanax mexicanus PRDM9b	270	0.17	15 (6.3e-8)
Astyanax mexicanus PRDM9a (Mexican tetra)	Salmo salar PRDM9a	348	0.0039	32 (1.1e-15)
Callorhinchus milii (Elephant shark)	Rhincodon typus (whale shark)	312	0.11	21 (1e-10)
Gadus morhua PRDM9 (Atlantic cod)	Salmo salar PRDM9a	327	0.15	14 (3.9e-4)

## Sheet: 3B
Supplementary File 3B. Amino acid diversity levels of PRDM9 ZF arrays and the proportion localized to known DNA-binding residues. Columns labeled V1-V28 indicate the amount of amino acid diversity observed at each amino acid in the ZF array. For each gene, we also report the ranking of this proportion relative to all other C2H2 ZF genes from the same species included in our analysis.
Organism	Major group	PRDM9 structure	Number of ZFs in tandem array	Proportion AA diversity at DNA-binding sites	Gene name	Rank	Number of ZF genes evaluated from species	DNA diversity (all sites)		V1	V2	V3 [C]	V4	V5	V6 [C]	V7	V8	V9	V10	V11 [DNA]	V12 [DNA]	V13	V14	V15 [DNA]	V16	V17	V18 [DNA]	V19 [H]	V20	V21	V22	V23 [H]	V24	V25	V26	V27	V28
Callorhinchus milii	cartilaginous fish	KRAB-SET	4	0.314286	CM1	6	63	0.170635		0.333333	0.5	0	0.5	0.666667	0	0	0	0.333333	0	0.666667	0.333333	0	0.333333	0.333333	0	0.333333	0.5	0	0.333333	0	0	0	0.333333	0	0	0	0.333333
Anguilla rostrata	bony fish	KRAB-SSXRD-SET	8	0.468208	AR2	NA	NA	0.127126		0.214286	0.214286	0	0.214286	0	0	0	0	0.214286	0	0.535714	0.75	0.785714	0.785714	0.75	0	0.214286	0.857143	0	0.214286	0	0	0	0	0	0	0.214286	0.214286
Anguilla rostrata	bony fish	KRAB-SSXRD-SET	4	0.37931	AR1	NA	NA	0.0952381		0.333333	0.333333	0	0.333333	0	0	0	0	0.333333	0	0.5	0.333333	0.5	0.5	0.5	0	0.333333	0.5	0	0.333333	0	0	0	0	0	0	0	0
Balaenoptera acutorostrata scammoni	placental	KRAB-SSXRD-SET	12	NA	XP_007172657	NA	272	0		0	0	0	0	0	0	0	0	0	0	0	0	0	0	0	0	0	0	0	0	0	0	0	0	0	0	0	0
Bison bison bison	placental	KRAB-SSXRD-SET	4	0.666667	XP_010831580	1	285	0.031746		0	0	0	0.333333	0	0	0	0	0	0	0	0.666667	0	0.333333	0.333333	0	0	0.333333	0	0	0	0	0	0	0	0	0	0
Bos taurus	placental	KRAB-SSXRD-SET	5	0.684211	NP_001306826	1	313	0.047619		0	0	0	0	0	0	0	0.3	0	0	0	0	0	0.3	0.7	0	0	0.6	0	0	0	0	0	0	0	0	0	0
Bos taurus	placental	KRAB-SSXRD-SET	10	0.414343	XP_015326119	6	313	0.115608		0	0.355556	0	0.466667	0.466667	0	0	0.466667	0	0	0.177778	0.8	0.177778	0.177778	0.577778	0	0.622222	0.755556	0	0.533333	0	0	0	0	0	0	0	0
Bubalus bubalis	placental	KRAB-SSXRD-SET	5	0.666667	XP_006072028	1	268	0.0321429		0	0	0	0	0	0	0	0	0	0	0	0.6	0	0.6	0	0	0	0.6	0	0	0	0	0	0	0	0	0	0
Chelonia mydas	turtle	KRAB-SSXRD-SET	6	0.413793	XP_007053470	11	235	0.123016		0	0	0	0	0	0	0	0	0	0	0.266667	0.466667	0.266667	0	0.533333	0	0.266667	0.733333	0	0	0.266667	0.266667	0	0.666667	0.266667	0.266667	0.3	0.266667
Chlorocebus sabaeus	placental	KRAB-SSXRD-SET	4	0.5	XP_007959455	1	344	0.031746		0	0.333333	0	0	0	0	0	0	0	0	0	0.333333	0	0	0.666667	0	0.333333	0	0	0	0	0	0	0	0	0	0	0.333333
Chrysemys picta bellii	turtle	KRAB-SSXRD-SET	6	0.478261	XP_005314362	1	308	0.0690476		0.266667	0.266667	0	0.266667	0	0	0	0	0	0	0.266667	0.266667	0	0.266667	0.666667	0	0.533333	0.266667	0	0	0	0	0	0	0	0	0	0
Cricetulus griseus	placental	KRAB-SSXRD-SET	9	0.78125	XP_007615273	3	259	0.0396825		0	0	0	0	0	0	0	0	0	0	0	0.5	0	0	0.5	0	0	0.388889	0	0	0	0.194444	0	0	0	0	0.194444	0
Dasypus novemcinctus	placental	KRAB-SSXRD-SET	8	0.613861	XP_012377774	1	289	0.0765306		0	0	0	0	0	0	0	0	0.214286	0	0	0.785714	0.535714	0	0.714286	0	0.428571	0.714286	0	0	0	0	0	0	0.214286	0	0	0
Deinagkistrodon acutus	squamata	KRAB-SSXRD-SET	5	0.302326	DA1	1	194	0.0702381		0	0	0	0.6	0.3	0	0	0	0	0.3	0	0.3	0	0	0.5	0	0.6	0.5	0	0.3	0.3	0	0	0	0.3	0.3	0	0
Dipodomys ordii	placental	KRAB-SSXRD-SET	8	0.56701	XP_012869273	1	234	0.0539966		0.535714	0	0	0	0	0	0	0.571429	0	0	0	0.75	0	0.392857	0.785714	0	0	0.428571	0	0	0	0	0	0	0	0	0	0
Esox lucius	bony fish	KRAB-SSXRD-SET	7	0.455378	XP_012987839	1	234	0.111111		0.266667	0.266667	0	0	0	0	0	0	0	0.266667	0.266667	0.6	0.466667	0.466667	0.6	0.266667	0	0.428571	0	0	0	0	0	0.266667	0	0	0	0
Fukomys damarensis	placental	KRAB-SSXRD-SET	6	0.43038	XP_010606829	3	227	0.104762		0.266667	0	0	0	0	0	0	0.266667	0	0	0.266667	0.666667	0.266667	0.6	0.733333	0	0.266667	0.6	0	0.533333	0.266667	0	0	0.266667	0	0	0.266667	0
Homo sapiens	placental	KRAB-SSXRD-SET	12	0.686747	NP_064612	1	357	0.0791847		0	0	0	0	0	0	0	0	0	0	0.409091	0.80303	0.606061	0	0.666667	0	0.151515	0.712121	0	0	0	0.424242	0	0	0	0	0	0
Latimeria chalumnae	coelacanth	KRAB-SSXRD-SET	6	0.545455	XP_005998057	2	227	0.059127		0	0	0	0.266667	0	0	0	0	0	0	0.533333	0.8	0.266667	0.533333	0.533333	0	0	0.533333	0	0	0	0.6	0	0	0.333333	0	0	0
Loxodonta africana	placental	KRAB-SSXRD-SET	11	0.617284	XP_010600166	1	381	0.0833333		0.163636	0.309091	0	0.327273	0	0	0	0.163636	0	0	0	0.709091	0	0	0.654545	0	0	0.454545	0	0	0.163636	0	0	0	0	0	0	0
Macaca fascicularis	placental	KRAB-SSXRD-SET	5	0.68	XP_015306727	1	364	0.0464286		0	0	0	0	0	0	0	0	0	0	0	0.7	0.3	0	0.5	0	0.5	0.5	0	0	0	0	0	0	0	0	0	0
Macaca mulatta	placental	KRAB-SSXRD-SET	7	0.644737	XP_001083675	1	366	0.074263		0	0	0	0	0	0	0	0	0	0	0.238095	0.761905	0.47619	0.238095	0.666667	0	0.571429	0.666667	0	0	0	0	0	0	0	0	0	0
Marmota marmota marmota	placental	KRAB-SSXRD-SET	5	0.482759	XP_015336536	1	277	0.0535714		0	0	0	0.3	0.6	0	0	0.6	0	0	0	0.6	0	0	0.5	0	0	0.3	0	0	0	0	0	0	0	0	0	0
Microcebus murinus	placental	KRAB-SSXRD-SET	4	1	XP_012592662	1	326	0.0416667		0	0	0	0	0	0	0	0	0	0	0	0.5	0	0	0.5	0	0	0.333333	0	0	0	0	0	0	0	0	0	0
Mus musculus	placental	KRAB-SSXRD-SET	10	0.910112	NP_659058	1	224	0.0338624		0	0	0	0	0	0	0	0	0	0	0	0.533333	0.177778	0	0.711111	0	0	0.555556	0	0	0	0	0	0	0	0	0	0
Nannospalax galili	placental	KRAB-SSXRD-SET	5	1	XP_008841629	1	307	0.015873		0	0	0	0	0	0	0	0	0	0	0	0.5	0	0	0.6	0	0	0.6	0	0	0	0	0	0	0	0	0	0
Octodon degus	placental	KRAB-SSXRD-SET	6	0.333333	XP_012368780	6	227	0.188095		0.266667	0.266667	0	0.466667	0	0	0	0	0.666667	0	0.8	0.6	0.533333	0	0.6	0.266667	0.6	0.666667	0	0.666667	0	0.266667	0	0.266667	0.266667	0.266667	0.266667	0.266667
Octodon degus	placental	KRAB-SSXRD-SET	7	0.330827	XP_012368246	5	227	0.213152		0.238095	0.238095	0	0.238095	0.238095	0	0	0	0.238095	0	0.428571	0.47619	0.238095	0.571429	0.571429	0	0.666667	0.619048	0	0	0	0.428571	0	0.238095	0.238095	0	0.428571	0.238095
Ophiophagus hannah	squamata	KRAB-SSXRD-SET	6	0.326531	OH1	NA	NA	0.122222		0	0	0	0.266667	0	0	0	0.6	0	0	0	0.3	0	0	0.5	0	0.266667	0.266667	0	0.533333	0	0	0	0	0	0	0	0.533333
Ophiosaurus gracilis	squamata	KRAB-SSXRD-SET	5	0.6	OG1	NA	NA	0.025		0	0	0	0	0	0	0	0	0	0	0	0.6	0	0.3	0	0	0	0.3	0	0	0	0	0	0.3	0	0	0	0
Ovis aries	placental	KRAB-SSXRD-SET	7	0.615385	XP_014960743	4	252	0.0459184		0	0	0	0	0	0	0	0	0	0	0	0.571429	0	0	0.571429	0	0	0	0	0	0	0	0	0	0	0.238095	0.238095	0.238095
Ovis aries	placental	KRAB-SSXRD-SET	10	0.397683	XP_011961597	1	252	0.132804		0	0	0	0.577778	0	0	0	0.622222	0	0	0.177778	0.866667	0.488889	0.355556	0.622222	0	0.533333	0.622222	0	0.533333	0.355556	0	0	0	0	0	0	0
Ovis aries musimon	placental	KRAB-SSXRD-SET	11	0.352761	XP_012021514	12	285	0.12619		0.163636	0	0	0.6	0	0	0	0.6	0	0	0.163636	0.818182	0.545455	0.563636	0.563636	0	0.436364	0.545455	0	0.6	0.163636	0	0	0	0	0	0	0.163636
Papio anubis	placental	KRAB-SSXRD-SET	9	0.584906	XP_009206458	1	404	0.083664		0	0.555556	0	0	0	0	0	0	0	0	0.5	0.722222	0.638889	0	0.722222	0	0.638889	0.638889	0	0	0	0	0	0	0	0	0	0
Pelodiscus sinensis	turtle	KRAB-SSXRD-SET	12	0.692308	XP_006118402	1	221	0.0441919		0	0	0	0	0	0	0	0	0	0	0	0.409091	0	0	0.530303	0	0.151515	0.424242	0	0.151515	0.30303	0	0	0	0	0	0	0
Peromyscus maniculatus bairdii	placental	KRAB-SSXRD-SET	8	1	XP_006976013	1	243	0.0527211		0	0	0	0	0	0	0	0	0	0	0.642857	0.571429	0	0	0.571429	0	0	0.642857	0	0	0	0	0	0	0	0	0	0
Petromyzon marinus	jawless fish	KRAB-SSXRD-SET	10	0.468992	PM3	NA	NA	0.147619		0.177778	0.488889	0	0.177778	0.177778	0	0.177778	0.177778	0.333333	0.177778	0.466667	0.755556	0.333333	0.466667	0.8	0	0.177778	0.666667	0	0	0	0.177778	0	0	0	0	0	0
Petromyzon marinus	jawless fish	KRAB-SSXRD-SET	9	0.408647	PM5	NA	NA	0.160714		0.194444	0.527778	0	0.361111	0.194444	0	0.194444	0.194444	0.361111	0.194444	0.194444	0.777778	0.194444	0.392857	0.714286	0	0.361111	0.638889	0	0	0	0	0	0	0	0	0	0.194444
Petromyzon marinus	jawless fish	KRAB-SSXRD-SET	9	0.390863	PM4	NA	NA	0.144841		0.194444	0.194444	0	0.194444	0.194444	0	0.361111	0.194444	0.194444	0.194444	0.194444	0.722222	0.527778	0.5	0.694444	0	0.194444	0.527778	0	0	0	0.388889	0	0	0	0	0	0
Petromyzon marinus	jawless fish	KRAB-SSXRD-SET	6	0.37234	PM1	NA	NA	0.180952		0.266667	0.466667	0	0.266667	0.266667	0	0.266667	0.266667	0.266667	0.266667	0.466667	0.6	0.466667	0.6	0.666667	0	0.266667	0.6	0	0	0	0.266667	0	0	0	0	0	0
Pogona vitticeps	squamata	KRAB-SSXRD-SET	6	0.66	PV1	NA	NA	0.0920635		0	0	0	0.266667	0	0	0	0	0	0	0.266667	0.6	0.6	0	0.666667	0	0.266667	0.666667	0	0	0	0	0	0	0	0	0	0
Protobothrops mucrosquamatus	squamata	KRAB-SSXRD-SET	10	0.45	XP_015673995	5	195	0.130159		0	0.177778	0	0	0	0	0	0	0.177778	0	0.622222	0.733333	0.466667	0.577778	0.577778	0	0.466667	0.466667	0	0.533333	0	0	0	0.177778	0	0.177778	0	0.177778
Python bivittatus	squamata	KRAB-SSXRD-SET	5	0.571429	XP_007430513	1	206	0.0380952		0	0	0	0	0	0	0	0	0	0	0	0.3	0	0.6	0.5	0	0	0	0	0	0	0	0	0	0	0	0	0
Rattus norvegicus	placental	KRAB-SSXRD-SET	8	0.57	NP_001102373	1	255	0.0522959		0	0	0	0	0	0	0	0.571429	0	0.214286	0.214286	0.392857	0	0	0.714286	0	0	0.714286	0	0.214286	0	0	0	0	0.535714	0	0	0
Rousettus aegyptiacus	placental	KRAB-SSXRD-SET	6	0.741935	XP_016011302	1	258	0.0396825		0	0	0	0.533333	0	0	0	0	0	0	0	0.6	0	0	0.666667	0	0	0.266667	0	0	0	0	0	0	0	0	0	0
Salmo salar	bony fish	KRAB-SSXRD-SET	4	0.538462	NP_001167383	9	510	0.111111		0.333333	0	0	0	0	0	0	0	0.666667	0	0.5	0.666667	0	0.333333	0.666667	0	0	0.5	0	0	0.333333	0.333333	0	0	0	0	0	0
Salmo salar	bony fish	KRAB-SSXRD-SET	5	0.5	XP_014056682	11	510	0.0964286		0.3	0.3	0	0	0	0	0	0.3	0	0	0.3	0.5	0.3	0.3	0.7	0	0.3	0.3	0	0	0	0	0	0	0	0	0	0
Sus scrofa	placental	KRAB-SSXRD-SET	8	0.542169	XP_013849667	1	248	0.0463435		0.392857	0	0	0.214286	0	0	0	0	0	0	0	0.428571	0	0	0.642857	0.214286	0.535714	0.535714	0	0	0	0	0	0	0	0	0	0
Thamnophis sirtalis	squamata	KRAB-SSXRD-SET	6	0.459016	TS1	3	179	0.0904762		0	0	0	0	0	0	0.533333	0.266667	0	0	0.266667	0.666667	0	0.266667	0.266667	0	0.6	0.666667	0	0	0	0.533333	0	0	0	0	0	0
Tupaia chinensis	placental	KRAB-SSXRD-SET	6	1	XP_014445586	1	249	0.0253968		0	0	0	0	0	0	0	0	0	0	0	0.533333	0	0	0.266667	0	0	0.266667	0	0	0	0	0	0	0	0	0	0
Tursiops truncatus	placental	KRAB-SSXRD-SET	14	0.939086	XP_004318641	1	233	0.0433019		0	0	0	0	0	0	0	0	0	0	0	0.648352	0	0	0.659341	0	0.131868	0.725275	0	0	0	0	0	0	0	0	0	0
Anguilla rostrata	bony fish	SET	11	0.237705	AR3	NA	NA	0.296537		0.727273	0.745455	0	0.745455	0.454545	0	0.163636	0.454545	0.563636	0	0.8	0.781818	0.763636	0.763636	0.818182	0	0.563636	0.763636	0	0.727273	0.563636	0.854545	0	0.436364	0.163636	0.454545	0.545455	0.454545
Astyanax mexicanus	bony fish	SET	17	0.258286	XP_015457453	60	158	0.334209		0.588235	0.911765	0	0.669118	0.617647	0	0	0.514706	0.617647	0.110294	0.823529	0.764706	0.867647	0.735294	0.860294	0.404412	0.786765	0.875	0	0.661765	0.316176	0.772059	0	0.110294	0.213235	0.213235	0.220588	0.213235
Astyanax mexicanus	bony fish	SET	4	0.166667	XP_007232920	152	158	0.34127		0.5	0.5	0	0.5	0.5	0	0.333333	0.333333	0.333333	0	0.333333	0.333333	0.333333	0.5	0.5	0	0.5	0.333333	0	0.5	0.666667	0.333333	0	0.5	0	0.5	0.333333	0.333333
Clupea harengus	bony fish	SET	16	0.278947	XP_012688414	6	118	0.261012		0.116667	0.741667	0	0.116667	0.658333	0	0.325	0.325	0.583333	0.116667	0.766667	0.708333	0.875	0.833333	0.858333	0.333333	0.425	0.758333	0	0.508333	0.325	0.508333	0	0.225	0.116667	0.333333	0.525	0
Clupea harengus	bony fish	SET	39	0.278284	XP_012683534	7	118	0.320834		0.388664	0.755735	0	0.483131	0.433198	0	0.192982	0.280702	0.777328	0.147099	0.746289	0.775978	0.870445	0.684211	0.836707	0.192982	0.322537	0.854251	0	0.545209	0.512821	0.650472	0	0.147099	0.099865	0.192982	0.464238	0.191633
Clupea harengus	bony fish	SET	6	0.273973	XP_012684264	10	118	0.157937		0	0.466667	0	0.466667	0	0	0	0.266667	0.266667	0	0	0.466667	0	0.266667	0.266667	0	0	0.6	0	0	0.466667	0.266667	0	0	0.266667	0.266667	0.266667	0.266667
Clupea harengus	bony fish	SET	4	0.157895	XP_012693119	114	118	0.291667		0.666667	0.5	0	0.5	0.5	0	0.333333	0.333333	0.666667	0	0.333333	0.333333	0.333333	0.5	0.5	0	0.5	0.333333	0	0.5	0.666667	0.5	0	0.5	0	0.333333	0.333333	0.333333
Cynoglossus semilaevis	bony fish	SET	4	0.181818	XP_008312579	80	107	0.293651		0.333333	0.5	0	0.5	0.5	0	0.333333	0.333333	0.333333	0	0.333333	0.333333	0.333333	0.333333	0.333333	0	0.333333	0.333333	0	0.5	0.333333	0.333333	0	0.333333	0	0.333333	0	0.333333
Cyprinus carpio	bony fish	SET	4	0.181818	CC2	NA	NA	0.339286		0.5	0.5	0	0.5	0.666667	0	0	0.333333	0.333333	0	0.5	0.333333	0.5	0.5	0.5	0	0.5	0.333333	0	0.5	0.666667	0.333333	0	0.5	0	0.5	0.333333	0.333333
Cyprinus carpio	bony fish	SET	4	0.173077	CC1	NA	NA	0.335317		0.5	0.5	0	0.5	0.5	0	0	0.333333	0.333333	0	0.333333	0.333333	0.333333	0.5	0.5	0	0.5	0.333333	0	0.5	0.666667	0.333333	0	0.5	0	0.5	0.333333	0.333333
Danio rerio	bony fish	SET	4	0.178571	NP_957196	345	367	0.321429		0.5	0.5	0	0.666667	0.666667	0	0	0.333333	0.333333	0	0.5	0.333333	0.5	0.5	0.5	0	0.5	0.333333	0	0.5	0.666667	0.333333	0	0.5	0	0.5	0.333333	0.333333
Esox lucius	bony fish	SET	6	0.295082	XP_010903548	32	234	0.268254		0.533333	0	0	0.266667	0.266667	0	0.6	0	0.466667	0	0.466667	0.666667	0.733333	0.6	0.666667	0.266667	0.666667	0.6	0	0.266667	0	0.533333	0	0	0	0.266667	0.266667	0
Esox lucius	bony fish	SET	4	0.192308	XP_010886959	176	234	0.327381		0.333333	0.5	0	0.5	0.333333	0	0.333333	0.333333	0.666667	0	0.5	0.333333	0.5	0.5	0.5	0	0.333333	0.333333	0	0.333333	0.333333	0.333333	0	0.333333	0	0.333333	0.666667	0.333333
Esox lucius	bony fish	SET	4	0.192308	EL1	177	234	0.327381		0.333333	0.5	0	0.5	0.333333	0	0.333333	0.333333	0.666667	0	0.5	0.333333	0.5	0.5	0.5	0	0.333333	0.333333	0	0.333333	0.333333	0.333333	0	0.333333	0	0.333333	0.666667	0.333333
Fundulus heteroclitus	bony fish	SET	4	0.188679	XP_012727150	158	206	0.265873		0.333333	0.5	0	0.5	0.5	0	0.666667	0.333333	0	0	0.5	0.333333	0.333333	0.5	0.5	0	0.333333	0.333333	0	0.5	0.5	0.333333	0	0.333333	0	0.5	0.666667	0.333333
Gadus morhua	bony fish	SET	4	0.163636	GM2	NA	NA	0.293651		0.666667	0.5	0	0.666667	0.5	0	0.5	0.333333	0.5	0	0.333333	0.333333	0.333333	0.5	0.5	0	0.5	0.333333	0	0.5	0.333333	0.333333	0	0.333333	0	0.5	0.333333	0.333333
Haplochromis burtoni	bony fish	SET	4	0.18	XP_005913622	148	168	0.303571		0	0.666667	0	0.5	0.5	0	0.666667	0.333333	0.333333	0	0.5	0.333333	0.333333	0.5	0.333333	0	0.333333	0.333333	0	0.5	0.333333	0.333333	0	0.333333	0	0.5	0.333333	0.333333
Ictalurus punctatus	bony fish	SET	15	0.319876	XP_017340366	14	140	0.268481		0.238095	0.771429	0	0.342857	0.6	0	0.12381	0.12381	0.6	0.12381	0.790476	0.8	0.438095	0.447619	0.619048	0.12381	0.685714	0.733333	0	0.438095	0.238095	0.342857	0	0.12381	0.12381	0.12381	0.12381	0.12381
Ictalurus punctatus	bony fish	SET	16	0.319272	XP_017312163	15	140	0.261607		0.116667	0.733333	0	0.225	0.625	0	0	0.116667	0.558333	0.116667	0.833333	0.716667	0.708333	0.508333	0.825	0.4	0.625	0.841667	0	0.225	0.325	0.658333	0	0.116667	0.225	0.225	0.233333	0.116667
Ictalurus punctatus	bony fish	SET	13	0.30649	IP10	24	140	0.274878		0.461538	0.75641	0	0.589744	0.589744	0	0.269231	0.141026	0.692308	0	0.717949	0.846154	0.782051	0.75641	0.871795	0.384615	0.5	0.833333	0	0.384615	0.384615	0.282051	0	0.141026	0.141026	0	0	0.141026
Ictalurus punctatus	bony fish	SET	12	0.302572	IP2	25	140	0.287518		0.151515	0.787879	0	0.151515	0.712121	0	0	0.575758	0.69697	0	0.69697	0.712121	0.757576	0.606061	0.757576	0.30303	0.606061	0.863636	0	0.424242	0.151515	0.424242	0	0	0	0	0.484848	0.151515
Ictalurus punctatus	bony fish	SET	14	0.286019	XP_017329028	33	140	0.272632		0.472527	0.824176	0	0.56044	0.758242	0	0.131868	0.252747	0.472527	0	0.725275	0.648352	0.571429	0.769231	0.758242	0.131868	0.252747	0.813187	0	0.131868	0.263736	0.604396	0	0.131868	0.252747	0.373626	0.131868	0.263736
Ictalurus punctatus	bony fish	SET	7	0.275676	XP_017314535	39	140	0.26644		0.619048	0.571429	0	0.428571	0.714286	0	0	0.47619	0.428571	0	0.714286	0.571429	0.714286	0.619048	0.428571	0	0.238095	0.714286	0	0.619048	0.238095	0.47619	0	0	0	0	0.238095	0
Ictalurus punctatus	bony fish	SET	10	0.252988	XP_017321561	55	140	0.292593		0.488889	0.8	0	0.622222	0.733333	0	0.6	0.177778	0.466667	0	0.488889	0.755556	0.688889	0.177778	0.777778	0.177778	0.577778	0.8	0	0.466667	0.355556	0.688889	0	0	0.488889	0.177778	0.466667	0.177778
Ictalurus punctatus	bony fish	SET	4	0.178571	XP_017339657	127	140	0.327381		0.5	0.5	0	0.5	0.5	0	0.333333	0.333333	0.333333	0	0.5	0.333333	0.5	0.5	0.5	0	0.5	0.333333	0	0.5	0.666667	0.333333	0	0.5	0	0.5	0.333333	0.333333
Larimichthys crocea	bony fish	SET	4	0.192308	XP_010747794	70	115	0.285714		0	0.5	0	0.666667	0.333333	0	0.5	0.333333	0.333333	0	0.5	0.333333	0.5	0.5	0.5	0	0.333333	0.333333	0	0.5	0.333333	0.333333	0	0.333333	0	0.5	0.666667	0.333333
Lepisosteus oculatus	bony fish	SET	11	0.223164	XP_015201633	48	106	0.304113		0.454545	0.8	0	0.854545	0.8	0	0.309091	0.309091	0.563636	0	0.654545	0.763636	0.8	0.563636	0.727273	0.163636	0.763636	0.727273	0	0.781818	0.163636	0.745455	0	0.309091	0	0.436364	0.618182	0.563636
Maylandia zebra	bony fish	SET	4	0.173077	XP_004556764	161	176	0.311508		0	0.666667	0	0.5	0.5	0	0.666667	0.333333	0.333333	0	0.5	0.333333	0.333333	0.5	0.333333	0	0.333333	0.333333	0	0.5	0.333333	0.333333	0	0.333333	0	0.5	0.666667	0.333333
Neolamprologus brichardi	bony fish	SET	4	0.173077	XP_006790997	141	152	0.305556		0	0.666667	0	0.5	0.5	0	0.666667	0.333333	0.333333	0	0.5	0.333333	0.333333	0.5	0.333333	0	0.333333	0.333333	0	0.5	0.333333	0.333333	0	0.333333	0	0.5	0.666667	0.333333
Nothobranchius furzeri	bony fish	SET	4	0.18	XP_015818282	245	266	0.321429		0	0.5	0	0.333333	0.5	0	0.333333	0.333333	0.5	0	0.333333	0.333333	0.333333	0.5	0.5	0	0.5	0.333333	0	0.5	0.333333	0.333333	0	0.333333	0	0.5	0.666667	0.333333
Notothenia coriiceps	bony fish	SET	4	0.166667	XP_010768978	83	87	0.323413		0.5	0.666667	0	0.5	0.5	0	0.5	0.333333	0.666667	0	0.5	0.333333	0.333333	0.5	0.333333	0	0.333333	0.333333	0	0.5	0.333333	0.333333	0	0.333333	0	0.5	0.333333	0.333333
Oreochromis niloticus	bony fish	SET	4	0.173077	XP_005458236	173	190	0.305556		0	0.666667	0	0.5	0.5	0	0.666667	0.333333	0.333333	0	0.5	0.333333	0.333333	0.5	0.333333	0	0.333333	0.333333	0	0.5	0.333333	0.333333	0	0.333333	0	0.5	0.666667	0.333333
Oryzias latipes	bony fish	SET	4	0.212766	XP_011486653	104	191	0.277778		0.333333	0.666667	0	0	0.333333	0	0.666667	0.333333	0	0	0.5	0.333333	0.333333	0.5	0.5	0	0.333333	0.333333	0	0.5	0.333333	0.333333	0	0.333333	0	0.5	0.333333	0.333333
Osteoglossum bicirrhosum	bony fish	SET	4	0.2	OB1	NA	NA	0.291667		0.5	0.5	0	0.333333	0.333333	0	0	0.333333	0.333333	0	0.5	0.333333	0.5	0.5	0.5	0	0.5	0.333333	0	0.5	0.333333	0.5	0	0.5	0	0.333333	0.333333	0.333333
Otolemur garnettii	placental	SET	6	0.265625	XP_012669412	121	285	0.188095		0.266667	0.533333	0	0.466667	0.666667	0	0	0.466667	0.466667	0	0.666667	0.666667	0.266667	0.466667	0.266667	0.266667	0.266667	0.666667	0	0.266667	0.533333	0.533333	0	0.266667	0	0	0	0.533333
Poecilia formosa	bony fish	SET	4	0.191489	XP_007571504	184	242	0.255952		0.333333	0.5	0	0	0.333333	0	0.666667	0.333333	0	0	0.5	0.333333	0.333333	0.5	0.333333	0	0.333333	0.333333	0	0.5	0.333333	0.333333	0	0.333333	0	0.5	0.666667	0.333333
Poecilia latipinna	bony fish	SET	4	0.191489	XP_014886810	175	235	0.255952		0.333333	0.5	0	0	0.333333	0	0.666667	0.333333	0	0	0.5	0.333333	0.333333	0.5	0.333333	0	0.333333	0.333333	0	0.5	0.333333	0.333333	0	0.333333	0	0.5	0.666667	0.333333
Poecilia mexicana	bony fish	SET	4	0.191489	XP_014866606	187	244	0.257937		0.333333	0.5	0	0	0.333333	0	0.666667	0.333333	0	0	0.5	0.333333	0.333333	0.5	0.333333	0	0.333333	0.333333	0	0.5	0.333333	0.333333	0	0.333333	0	0.5	0.666667	0.333333
Poecilia reticulata	bony fish	SET	4	0.191489	XP_008435498	162	212	0.257937		0.333333	0.5	0	0	0.333333	0	0.666667	0.333333	0	0	0.5	0.333333	0.333333	0.5	0.333333	0	0.333333	0.333333	0	0.5	0.333333	0.333333	0	0.333333	0	0.5	0.666667	0.333333
Pundamilia nyererei	bony fish	SET	4	0.173077	XP_005725955	134	147	0.305556		0	0.666667	0	0.5	0.5	0	0.666667	0.333333	0.333333	0	0.5	0.333333	0.333333	0.5	0.333333	0	0.333333	0.333333	0	0.5	0.333333	0.333333	0	0.333333	0	0.5	0.666667	0.333333
Pygocentrus nattereri	bony fish	SET	10	0.330864	XP_017573455	12	142	0.237831		0.333333	0.844444	0	0.333333	0.488889	0	0	0.177778	0.355556	0	0.688889	0.733333	0.577778	0.488889	0.755556	0	0.488889	0.8	0	0.6	0.333333	0.488889	0	0.333333	0	0.177778	0	0
Pygocentrus nattereri	bony fish	SET	4	0.178571	XP_017541498	124	142	0.325397		0.5	0.5	0	0.5	0.5	0	0.333333	0.333333	0.333333	0	0.5	0.333333	0.5	0.5	0.5	0	0.5	0.333333	0	0.5	0.666667	0.333333	0	0.5	0	0.5	0.333333	0.333333
Salmo salar	bony fish	SET	4	0.1875	XP_014035316	411	510	0.297619		0.5	0.5	0	0.333333	0.5	0	0.333333	0.333333	0.333333	0	0.333333	0.333333	0.5	0.5	0.5	0	0.333333	0.333333	0	0.5	0.333333	0.5	0	0.333333	0	0.333333	0	0.333333
Salmo salar	bony fish	SET	4	0.18	XP_014065384	454	510	0.293651		0.333333	0.5	0	0.333333	0.5	0	0.333333	0.333333	0.5	0	0.333333	0.333333	0.5	0.5	0.5	0	0.333333	0.333333	0	0.333333	0.333333	0.5	0	0.333333	0	0.333333	0.333333	0.5
Salmo trutta	bony fish	SET	4	0.1875	ST3	NA	NA	0.301587		0.5	0.5	0	0.333333	0.5	0	0.333333	0.333333	0.333333	0	0.333333	0.333333	0.5	0.5	0.5	0	0.333333	0.333333	0	0.5	0.333333	0.5	0	0.333333	0	0.333333	0	0.333333
Scleropages formosus	bony fish	SET	7	0.244726	SF4	NA	NA	0.37415		0.619048	0.619048	0	0.428571	0.428571	0	0	0.714286	0	0	0.714286	0.714286	0.619048	0.714286	0.761905	0	0.238095	0.571429	0	0.428571	0.666667	0.714286	0	0.571429	0.428571	0.238095	0.666667	0.428571
Scleropages formosus	bony fish	SET	4	0.196078	XP_018597508	NA	NA	0.297619		0.5	0.5	0	0.333333	0.333333	0	0	0.333333	0.5	0	0.5	0.333333	0.5	0.5	0.5	0	0.5	0.333333	0	0.5	0.333333	0.5	0	0.5	0	0.333333	0.333333	0.333333
Sinocyclocheilus anshuiensis	bony fish	SET	4	0.185185	XP_016336611	224	284	0.343254		0.333333	0.5	0	0.5	0.666667	0	0	0.333333	0.333333	0	0.5	0.333333	0.5	0.5	0.5	0	0.5	0.333333	0	0.5	0.666667	0.333333	0	0.5	0	0.5	0.333333	0.333333
Sinocyclocheilus anshuiensis	bony fish	SET	4	0.185185	XP_016325578	225	284	0.331349		0.5	0.5	0	0.5	0.5	0	0	0.333333	0.333333	0	0.5	0.333333	0.5	0.5	0.5	0	0.5	0.333333	0	0.5	0.666667	0.333333	0	0.5	0	0.5	0.333333	0.333333
Sinocyclocheilus grahami	bony fish	SET	4	0.185185	XP_016100247	211	271	0.331349		0.5	0.5	0	0.5	0.5	0	0	0.333333	0.333333	0	0.5	0.333333	0.5	0.5	0.5	0	0.5	0.333333	0	0.5	0.666667	0.333333	0	0.5	0	0.5	0.333333	0.333333
Sinocyclocheilus rhinocerous	bony fish	SET	4	0.185185	XP_016409963	208	269	0.343254		0.333333	0.5	0	0.5	0.666667	0	0	0.333333	0.333333	0	0.5	0.333333	0.5	0.5	0.5	0	0.5	0.333333	0	0.5	0.666667	0.333333	0	0.5	0	0.5	0.333333	0.333333
Sinocyclocheilus rhinocerous	bony fish	SET	4	0.185185	XP_016373978	209	269	0.331349		0.5	0.5	0	0.5	0.5	0	0	0.333333	0.333333	0	0.5	0.333333	0.5	0.5	0.5	0	0.5	0.333333	0	0.5	0.666667	0.333333	0	0.5	0	0.5	0.333333	0.333333
Squalius pyrenaicus	bony fish	SET	4	0.185185	SP1	NA	NA	0.335317		0.5	0.5	0	0.333333	0.666667	0	0	0.333333	0.333333	0	0.5	0.333333	0.5	0.5	0.5	0	0.5	0.333333	0	0.5	0.666667	0.333333	0	0.5	0	0.5	0.333333	0.333333
Squalius pyrenaicus	bony fish	SET	4	0.185185	SP2	NA	NA	0.335317		0.5	0.5	0	0.333333	0.666667	0	0	0.333333	0.333333	0	0.5	0.333333	0.5	0.5	0.5	0	0.5	0.333333	0	0.5	0.666667	0.333333	0	0.5	0	0.5	0.333333	0.333333
Takifugu rubripes	bony fish	SET	4	0.1875	XP_011601013	66	98	0.293651		0	0.5	0	0.5	0.5	0	0.5	0.333333	0.333333	0	0.5	0.333333	0.333333	0.5	0.333333	0	0.333333	0.333333	0	0.5	0.333333	0.333333	0	0.333333	0	0.5	0.333333	0.333333
Xiphophorus maculatus	bony fish	SET	4	0.191489	XP_014328922	117	158	0.253968		0.333333	0.5	0	0	0.333333	0	0.666667	0.333333	0	0	0.5	0.333333	0.333333	0.5	0.333333	0	0.333333	0.333333	0	0.5	0.333333	0.333333	0	0.333333	0	0.5	0.666667	0.333333
Bos taurus	placental	KRAB-SSXRD-SET	13	0.414079	XP_015315796	7	313	0.122863		0	0.384615	0	0.551282	0.384615	0	0	0.487179	0	0	0.397436	0.807692	0.269231	0.282051	0.653846	0	0.589744	0.705128	0	0.538462	0	0	0	0	0.141026	0	0	0
Myotis lucifugus	placental	SSXRD-SET	5	0.52381	XP_006108588	1	308	0.0714286		0	0.3	0	0	0	0	0	0	0	0.5	0.6	0.5	0.3	0	0.5	0	0	0.6	0	0	0	0	0	0	0.3	0	0.3	0.3
Myotis lucifugus	placental	SSXRD-SET	20	0.31021	XP_014301234	68	308	0.342231		0.184211	0.773684	0	0.8	0.431579	0	0.0947368	0.505263	0.794737	0	0.789474	0.852632	0.805263	0.352632	0.878947	0	0.526316	0.821053	0	0.268421	0.189474	0.505263	0	0.568421	0.184211	0	0.352632	0.0947368
Octodon degus	placental	SSXRD-SET	5	0.282051	XP_012368855	46	227	0.196429		0	0	0	0.7	0.3	0	0.5	0	0.6	0	0.6	0.6	0.3	0	0.5	0.5	0.3	0.5	0	0.6	0	0.3	0	0.3	0.3	0.3	0.3	0.3
Sarcophilus harrisii	marsupial	SSXRD-SET	4	0.22449	XP_012401125	277	344	0.15873		0.333333	0.333333	0	0.333333	0	0	0	0.666667	0.333333	0	0.666667	0.5	0.666667	0	0.333333	0	0.666667	0.333333	0	0	0.333333	0.5	0	0.5	0.5	0.5	0.333333	0.333333

## Sheet: 3C
Supplementary File 3C. Likelihood ratio of neutral versus not non-neutral evolution along the SET domain of mammalian PRDM9 orthologs lacking a KRAB or SSXRD domain annotated in RefSeq, and whether another annotated ortholog exists with a KRAB domain.
Refseq gene name	Alignment length	Likelihood difference	dN/dS	p-value	Other annotated complete ortholog?
LOC102441203.Myotis.lucifugus	348	15.5887	0.16	4.71002e-08
PRDM7.Leptonychotes.weddellii	348	27.4087	0.048	2.64455e-13
LOC103213575.Orycteropus.afer.afer	348	16.6038	0.039	1.65646e-08
LOC103304164.Eptesicus.fuscus	348	16.4459	0.074	1.94868e-08
LOC103582578.Galeopterus.variegatus	348	11.2628	0.1603	4.1472e-06	Y
LOC103583815.Galeopterus.variegatus	348	8.49089	0.1172	7.54807e-05	Y
PRDM7.Rhinopithecus.roxellana	348	0.846777	NA	0.38	Y
PRDM7.Colobus.angolensis.palliatus	348	2.6032	0.1031	0.045
PRDM7.Mandrillus.leucophaeus	348	0.715616	0.41	0.46	Y
PRDM7.Nomascus.leucogenys	348	2.0556	0.2782	0.085
LOC101577431.Octodon.degus	348	26.2749	0.1119	8.38885e-13	Y
Prdm9.Octodon.degus	348	14.738	0.1065	1.1323e-07	Y
LOC101575321.Octodon.degus	348	24.8487	0.0017	3.58757e-12	Y
LOC100923245.Sarcophilus.harrisii	348	46.2699	0.0592	<1e-10
PRDM7.Sus.scrofa	348	37.8726	0.0454	<1e-10	Y
LOC102430475.Myotis.lucifugus	348	16.1693	0.1515	2.59036e-08
LOC102440075.Myotis.lucifugus	348	12.5275	0.1951	1.11439e-06
LOC102262117.Myotis.brandtii	348	15.5862	0.1551	4.72214e-08
PRDM7.Equus.caballus	348	27.254	0.055	3.0953e-13
LOC100336498.Bos.taurus	348	14.0425	0.1751	2.32217e-07	Y
LOC100139638.Bos.taurus	348	17.0462	0.1473	1.05107e-08	Y
LOC102765569.Myotis.davidii	348	14.8054	0.1533	1.05621e-07
LOC750421.Pan.troglodytes	348	0.565147	0.466	0.575425	Y
