# Supplementary figures and images for: Repeated losses of PRDM9-directed recombination despite the conservation of PRDM9 across vertebrates
Source: eLife journal article supplement (doi:10.7554/elife.24133), 2017-06-06

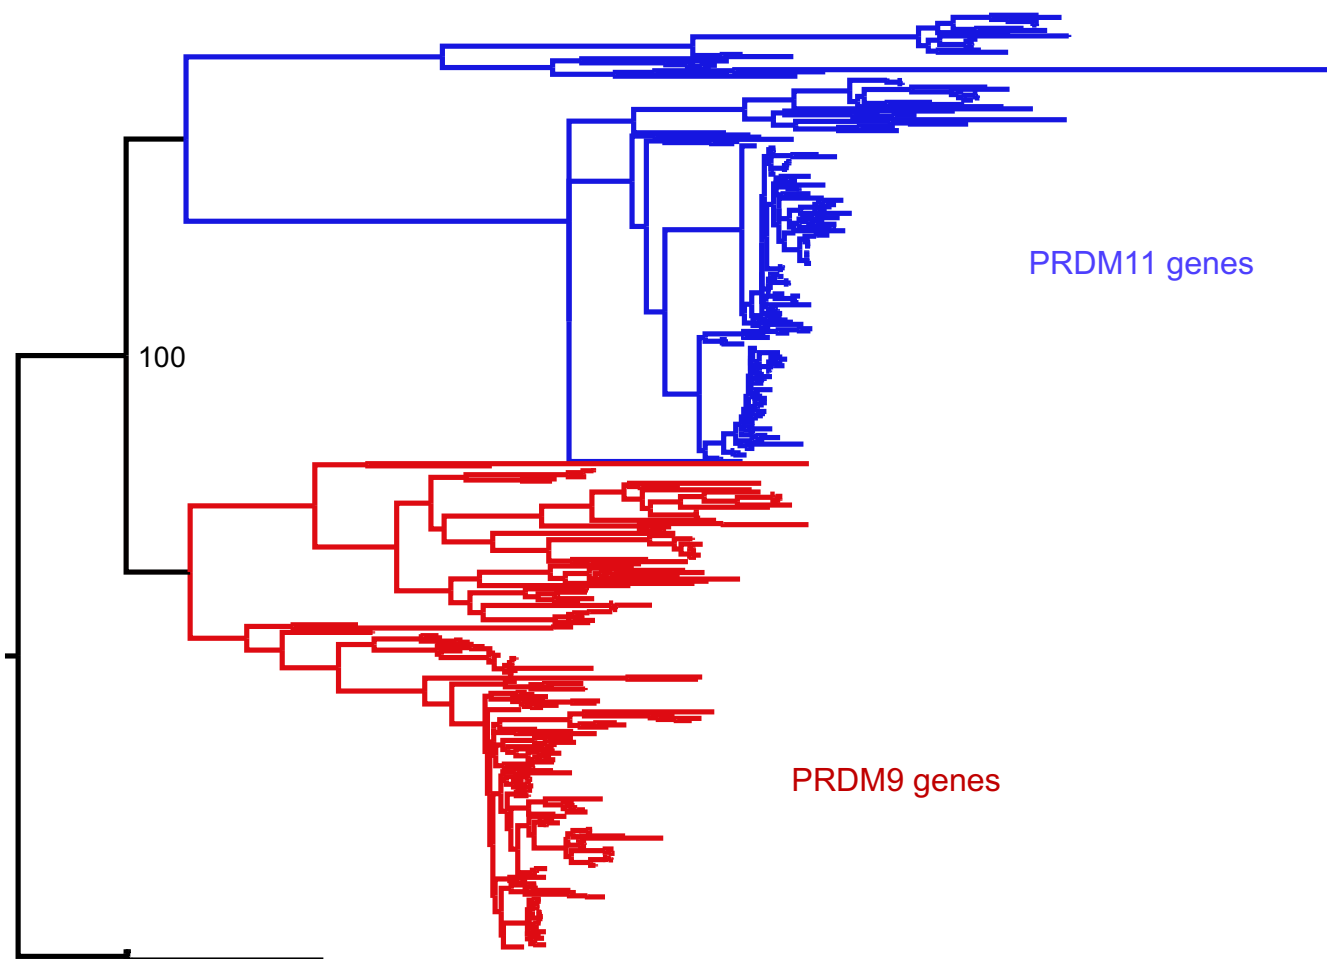

Supplement: supp [file elife_poa_e24133_Figure_1_Figure_Supplement_1.pdf › elife_poa_e24133_Figure_1_Figure_Supplement_1.pdf]

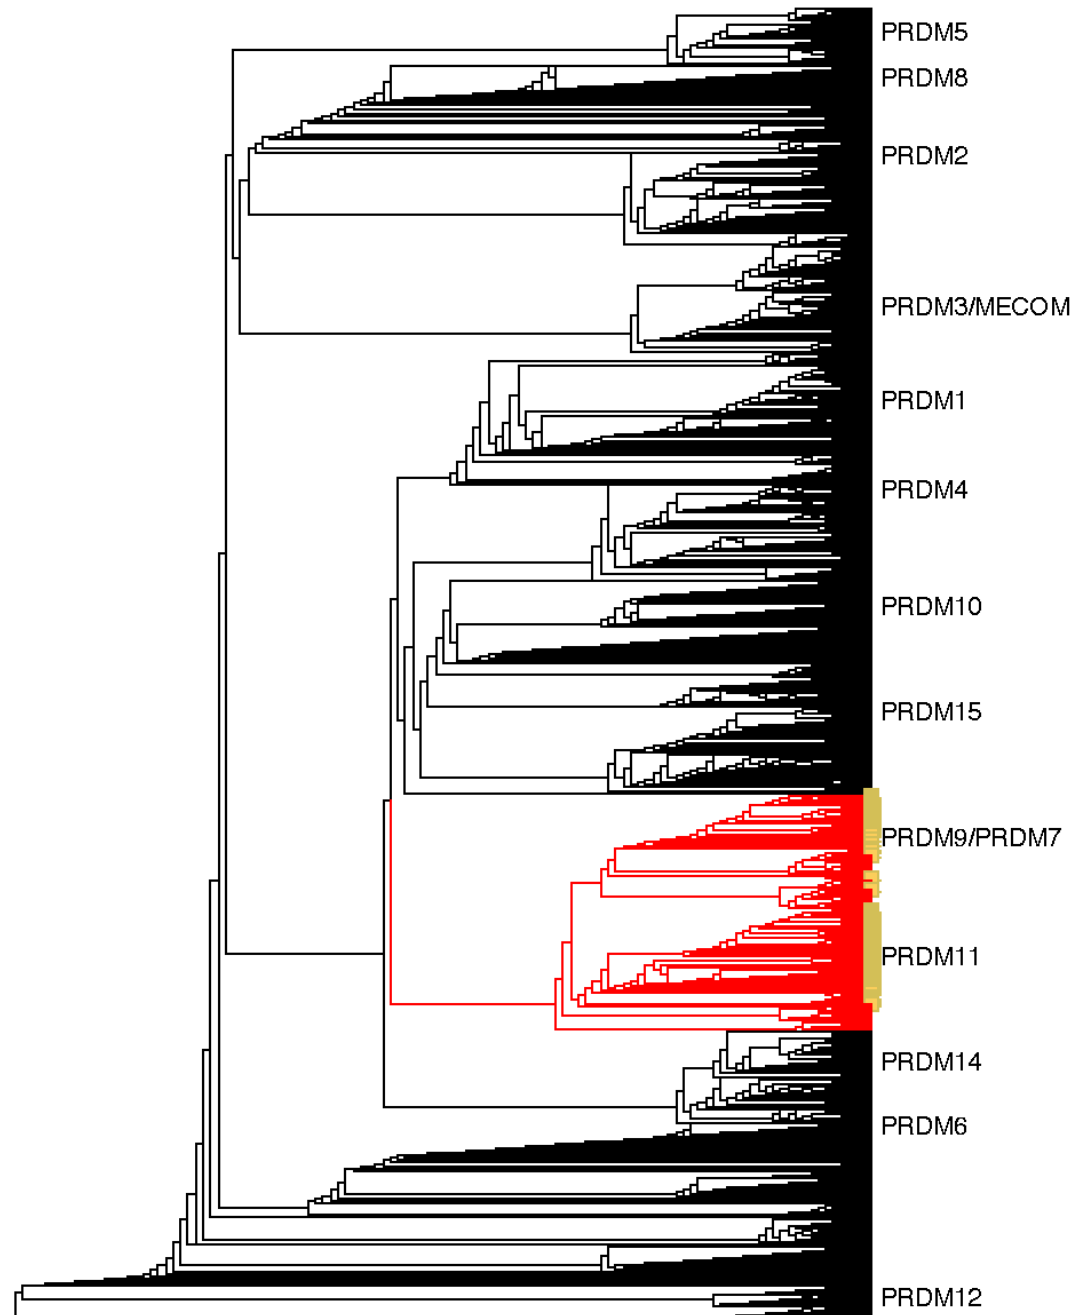

Supplement: supp [file elife_poa_e24133_Figure_1_Figure_Supplement_2.pdf › elife_poa_e24133_Figure_1_Figure_Supplement_2.pdf]

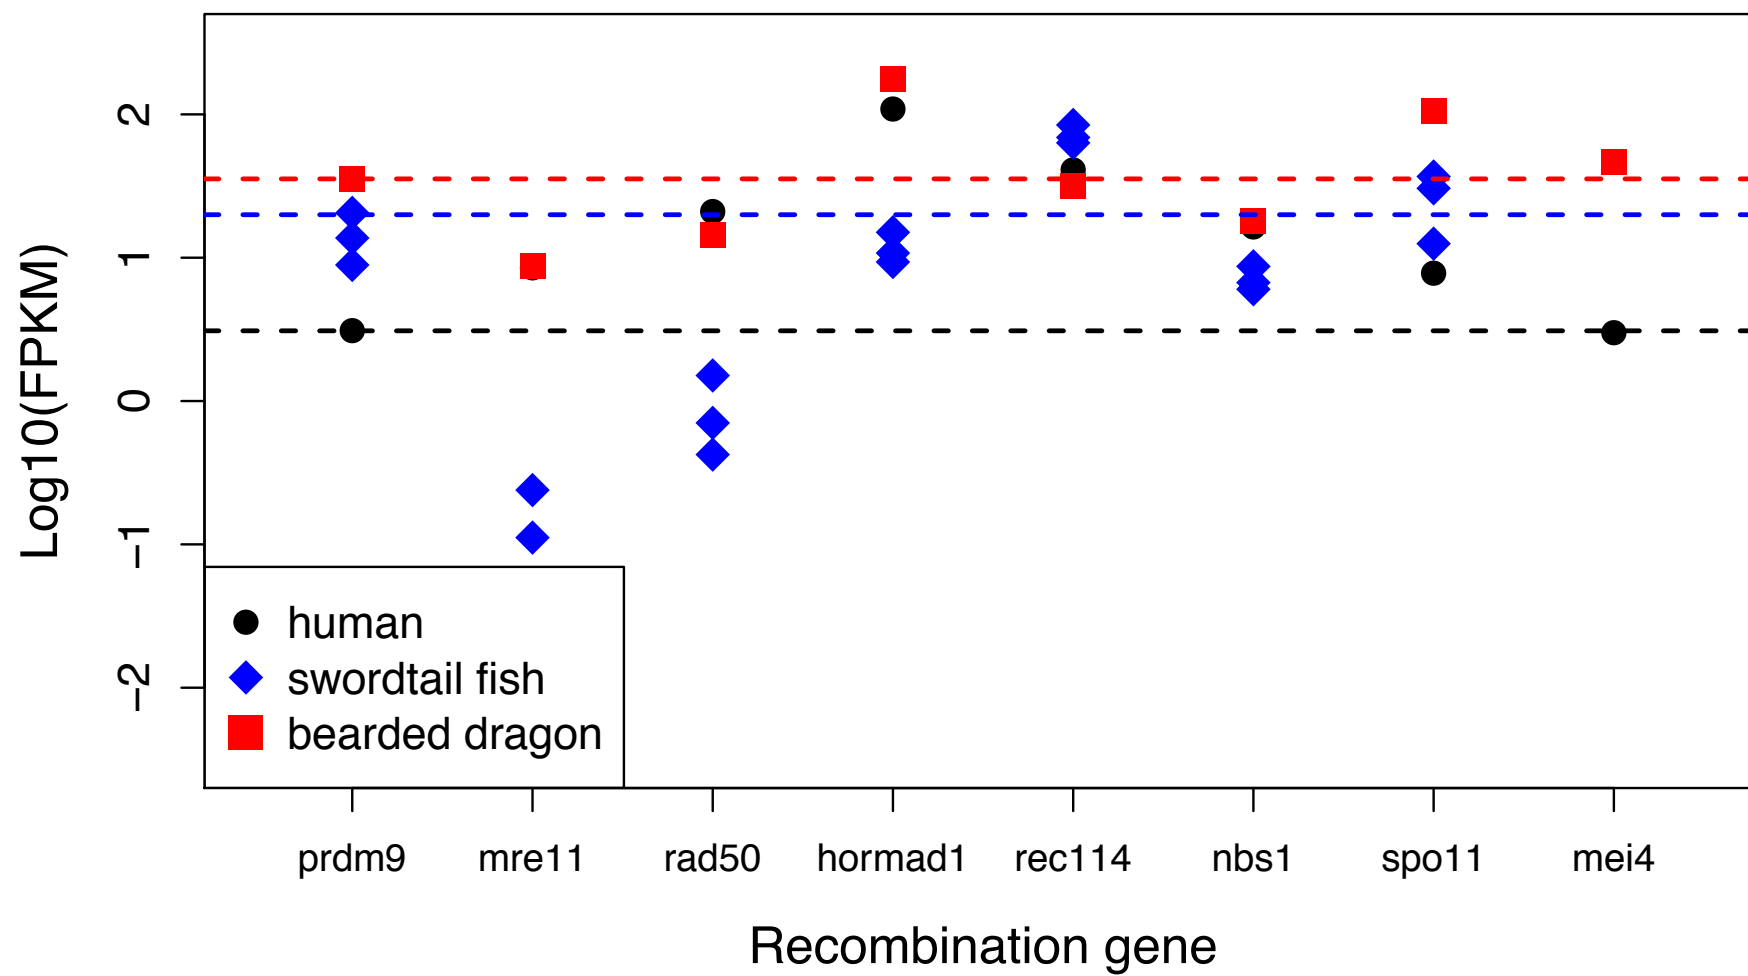

Supplement: supp [file elife_poa_e24133_Figure_1_Figure_Supplement_3.pdf › elife_poa_e24133_Figure_1_Figure_Supplement_3.pdf]

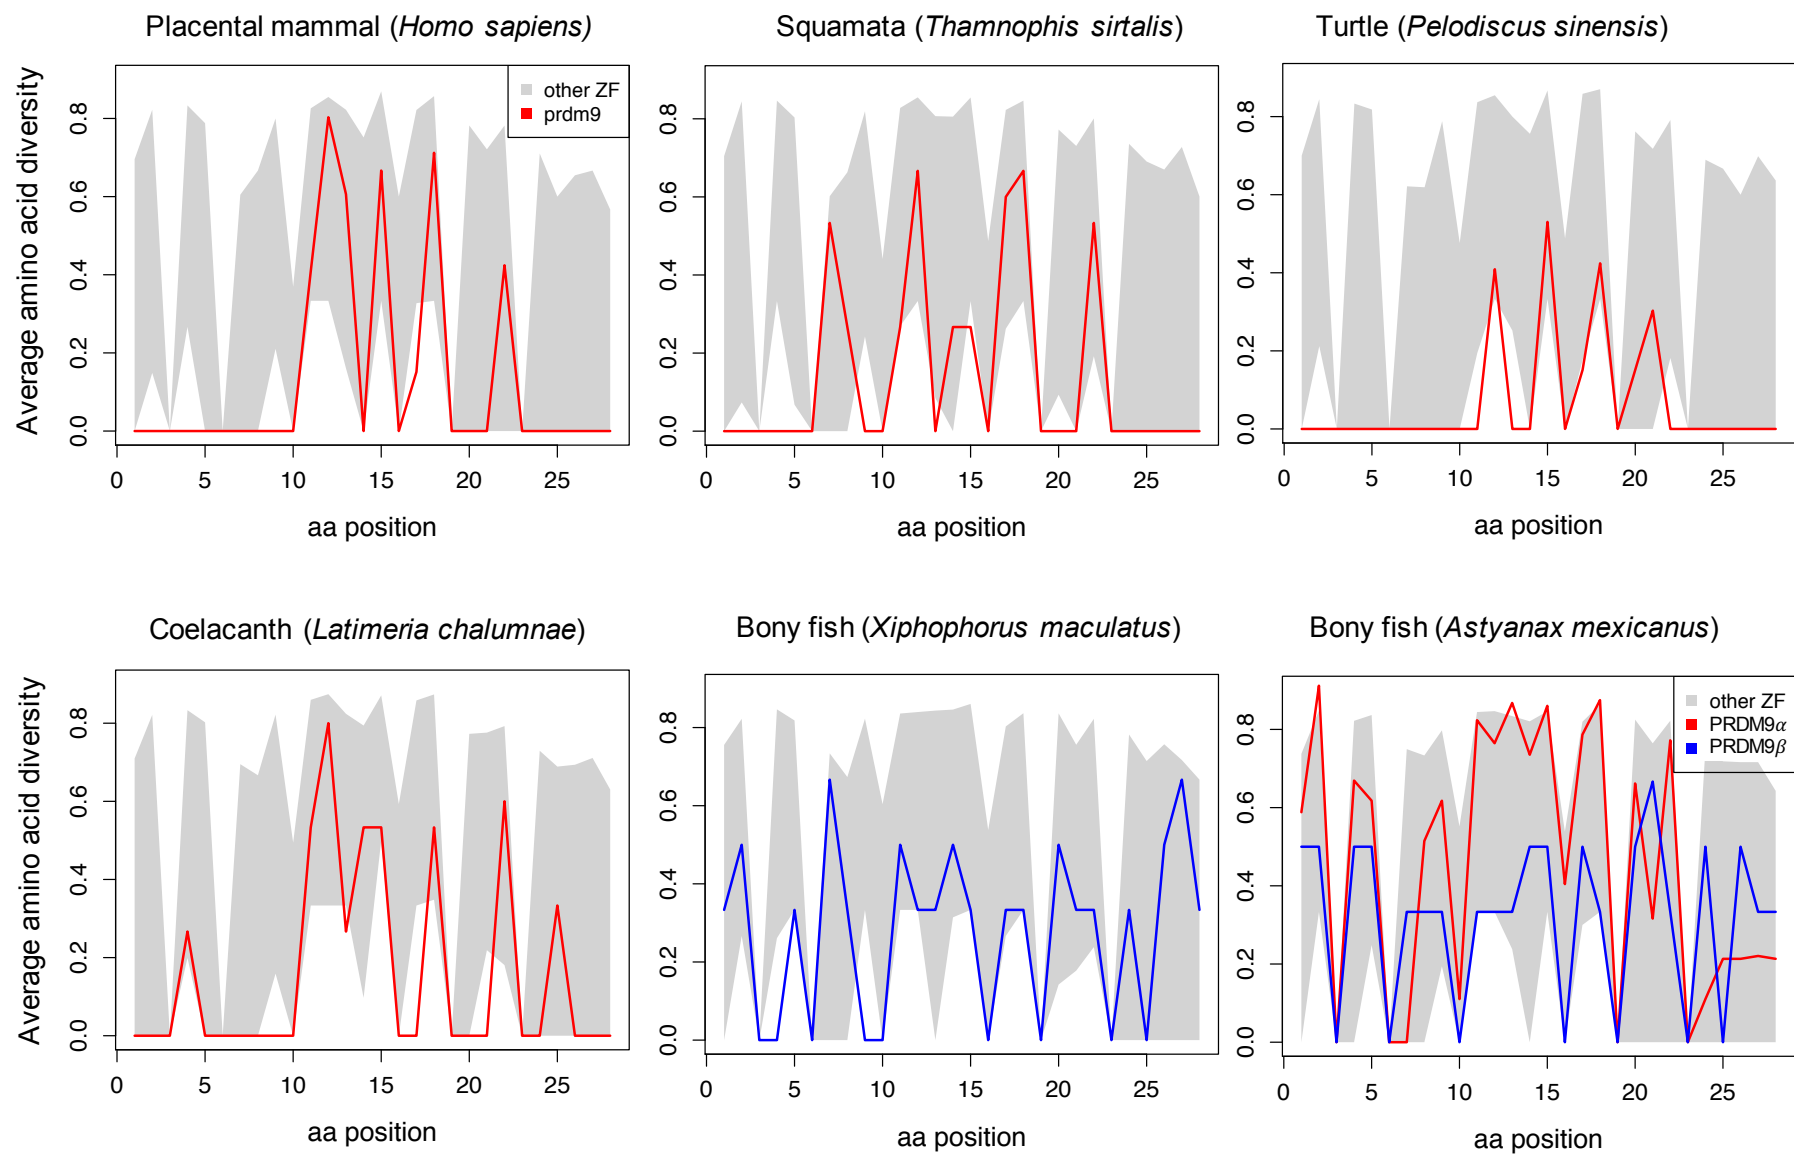

Supplement: supp [file elife_poa_e24133_Figure_1_Figure_Supplement_4.pdf › elife_poa_e24133_Figure_1_Figure_Supplement_4.pdf]

**Bony fish (swordtail)**

Allele/individual 2

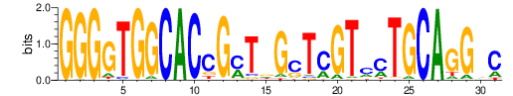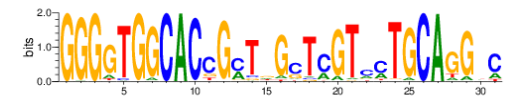

Supplement: supp [file elife_poa_e24133_Figure_1_Figure_Supplement_5.pdf › elife_poa_e24133_Figure_1_Figure_Supplement_5.pdf]

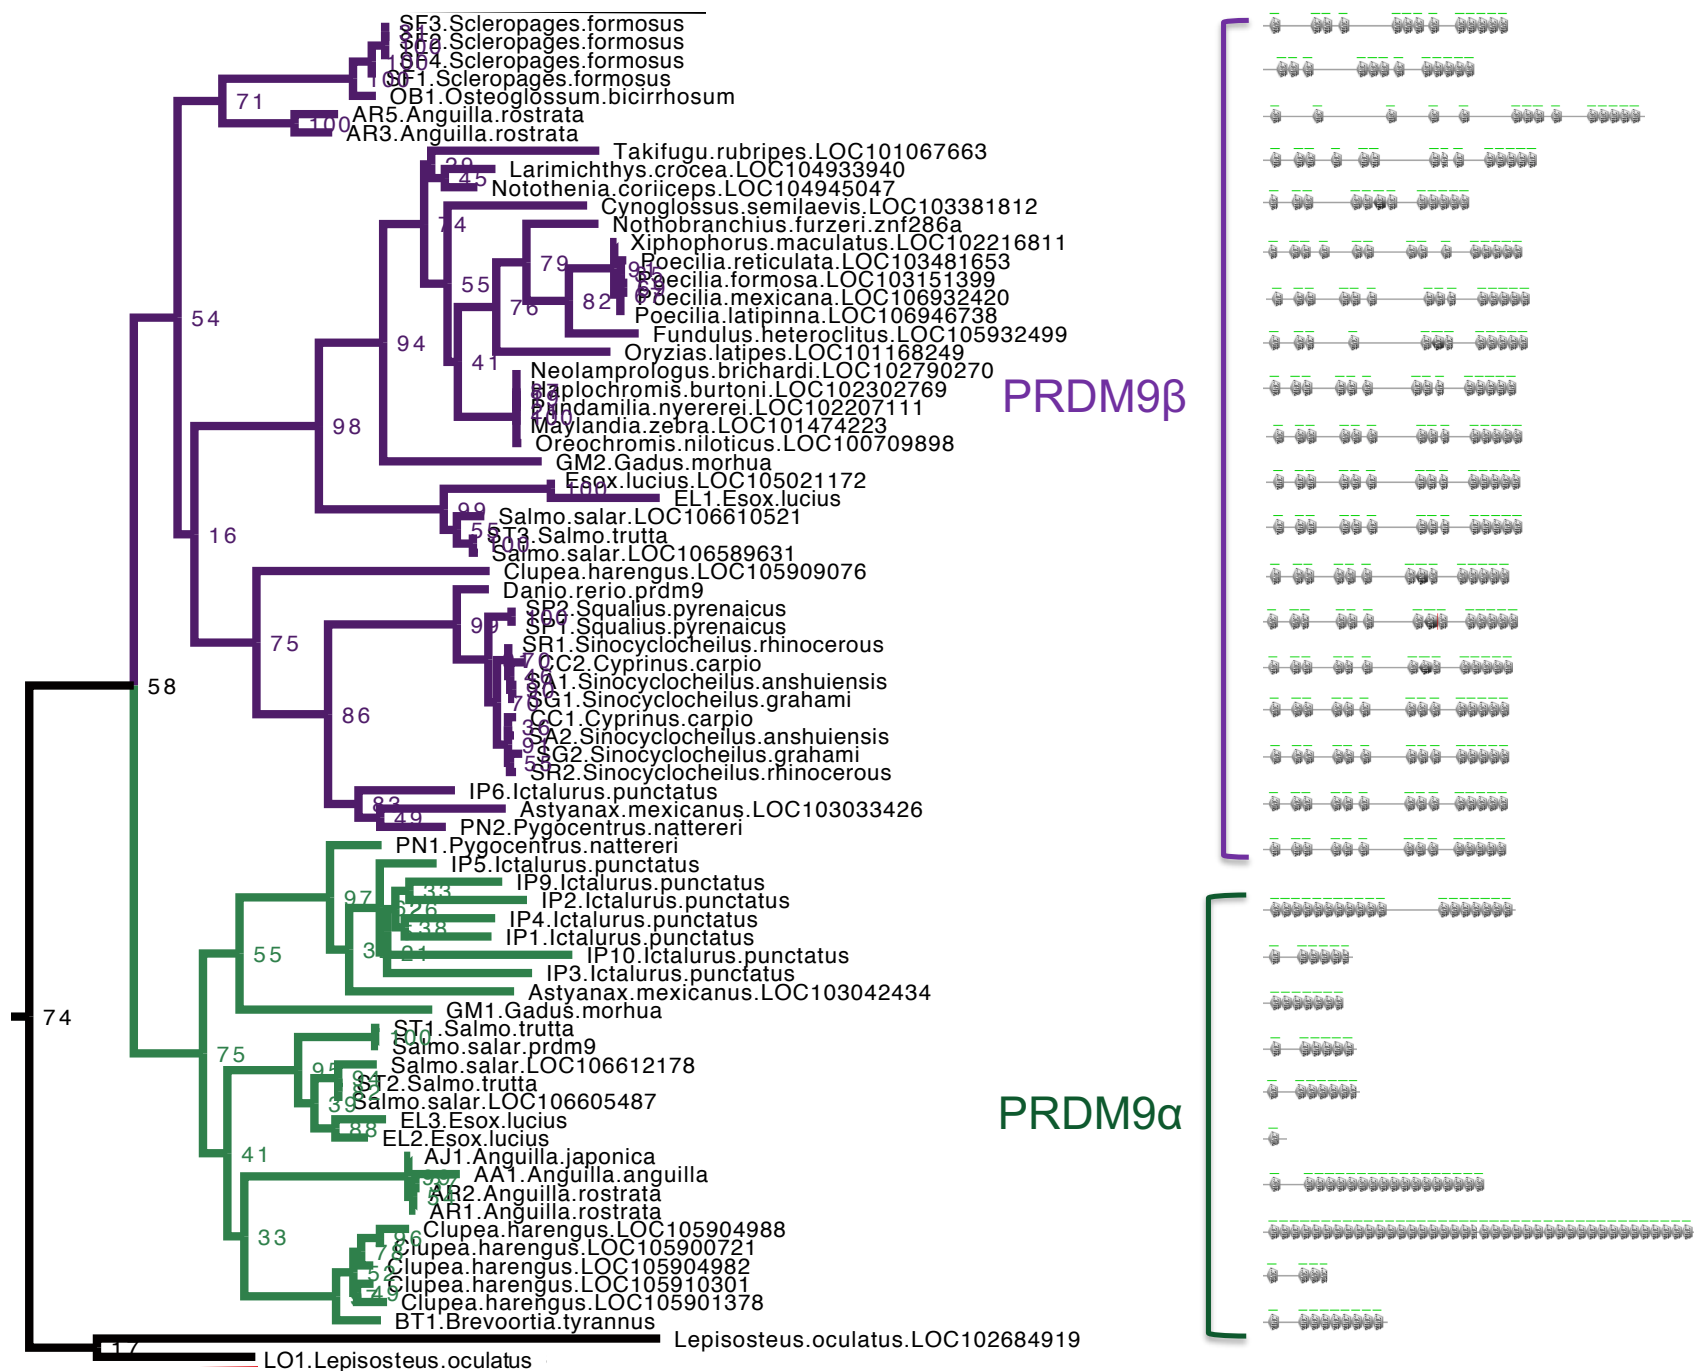

Supplement: supp [file elife_poa_e24133_Figure_2_Figure_Supplement_1.pdf › elife_poa_e24133_Figure_2_Figure_Supplement_1.pdf]

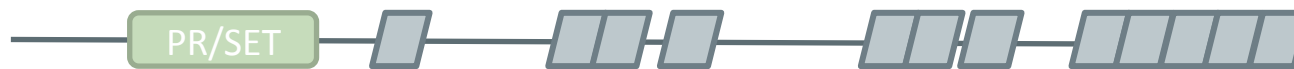

## Groups

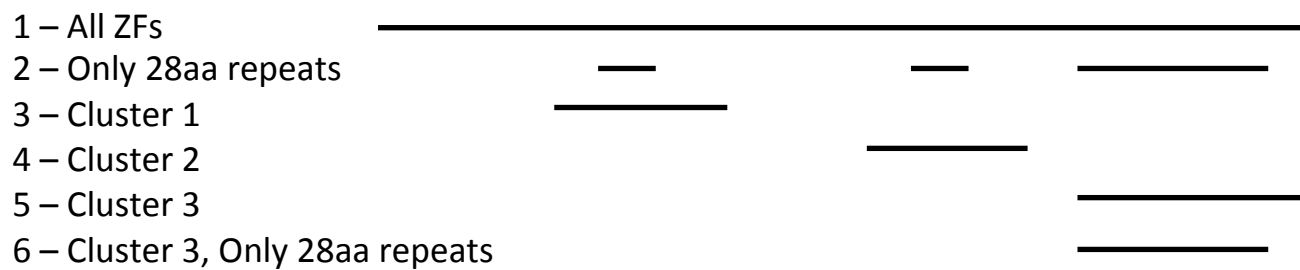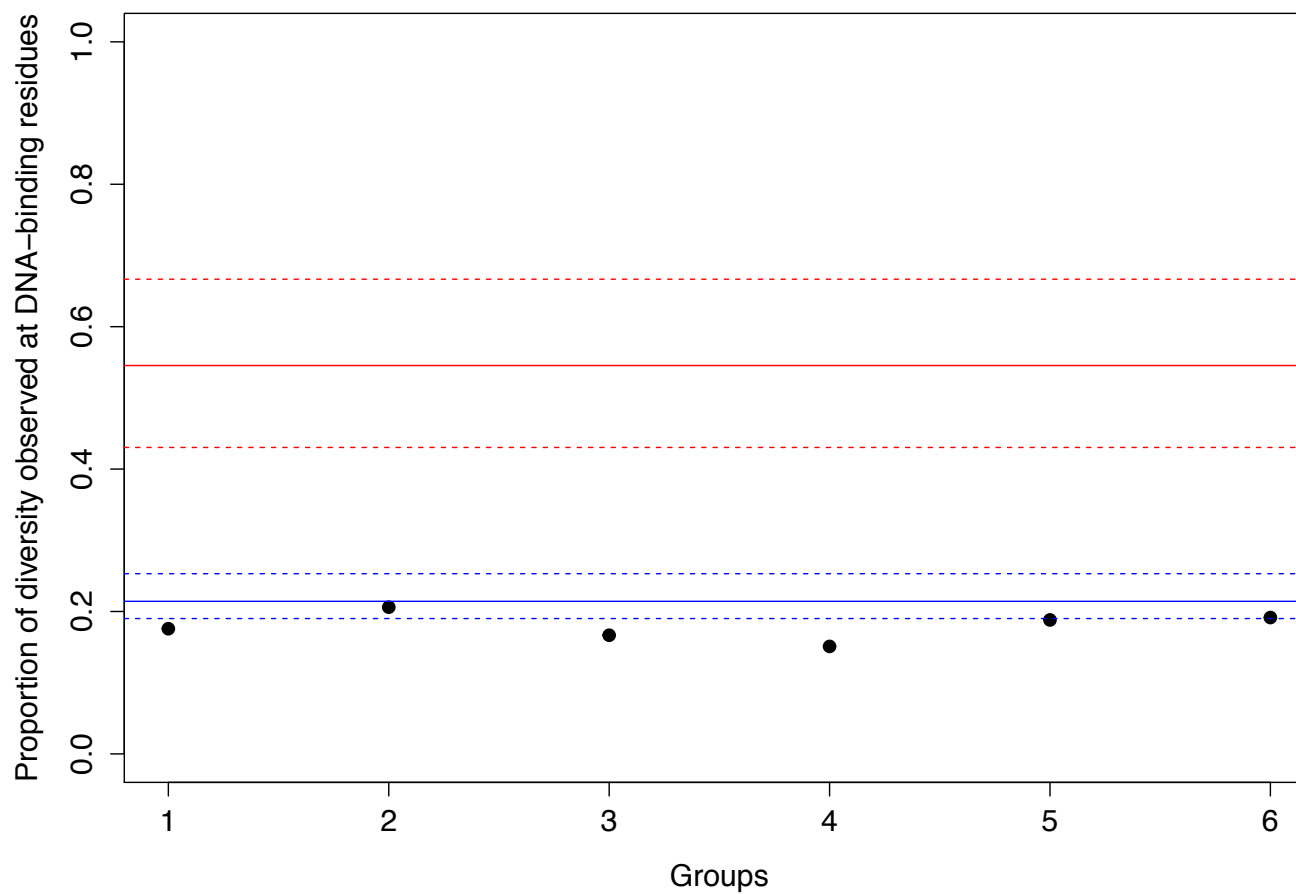

Supplement: supp [file elife_poa_e24133_Figure_2_Figure_Supplement_2.pdf › elife_poa_e24133_Figure_2_Figure_Supplement_2.pdf]

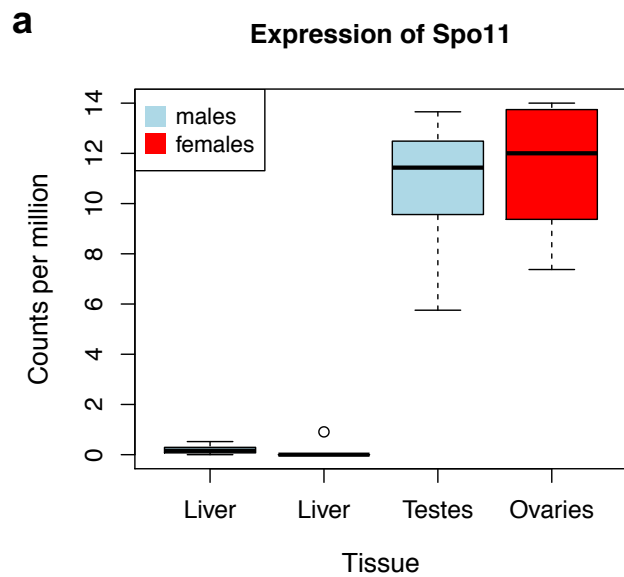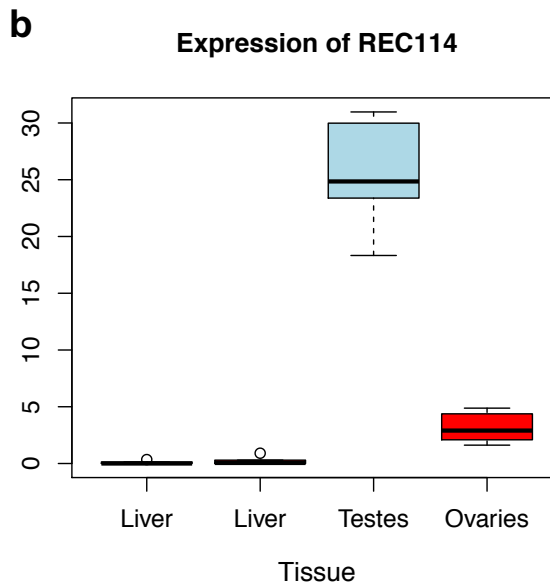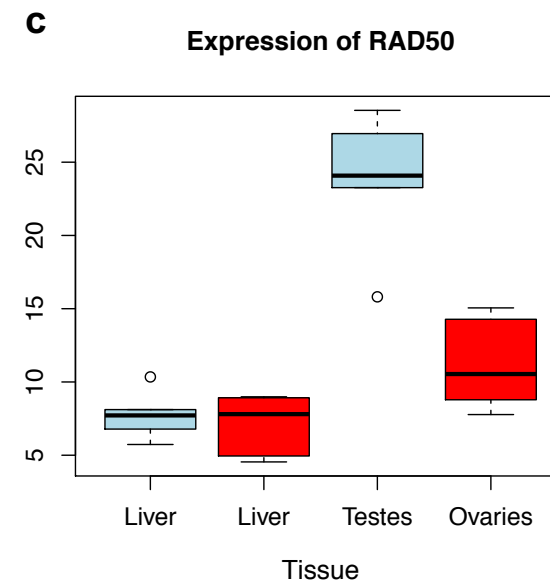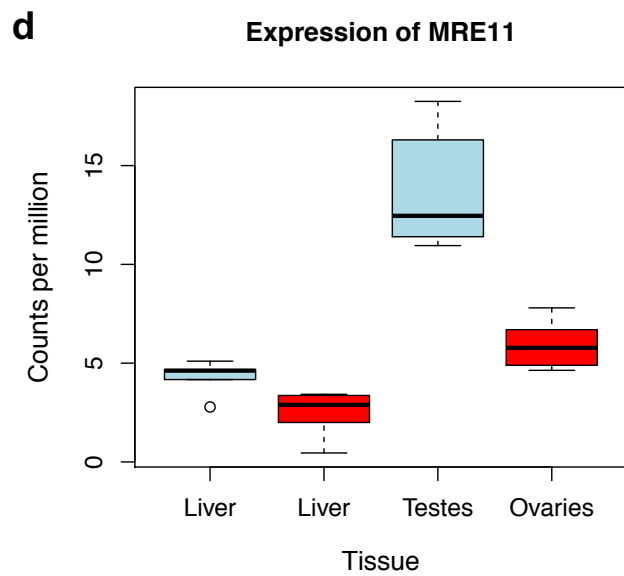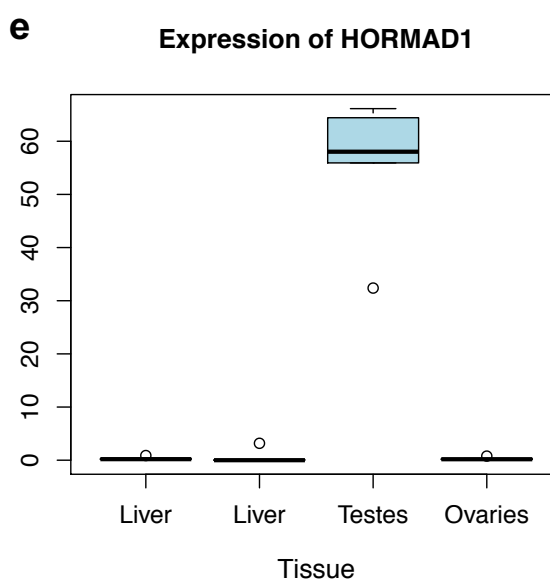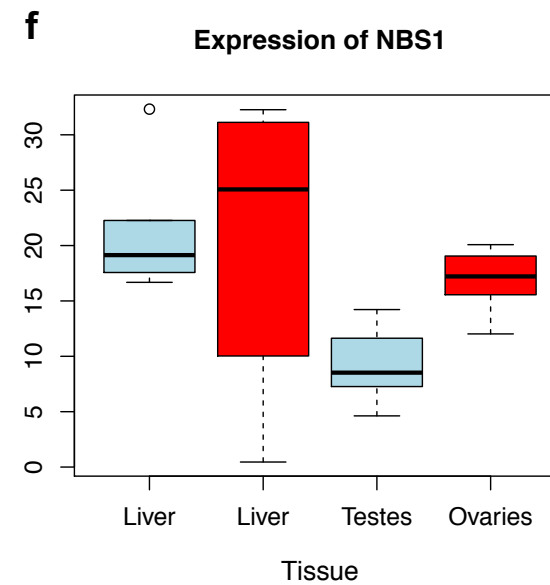

Supplement: supp [file elife_poa_e24133_Figure_4_Figure_Supplement_1.pdf › elife_poa_e24133_Figure_4_Figure_Supplement_1.pdf]

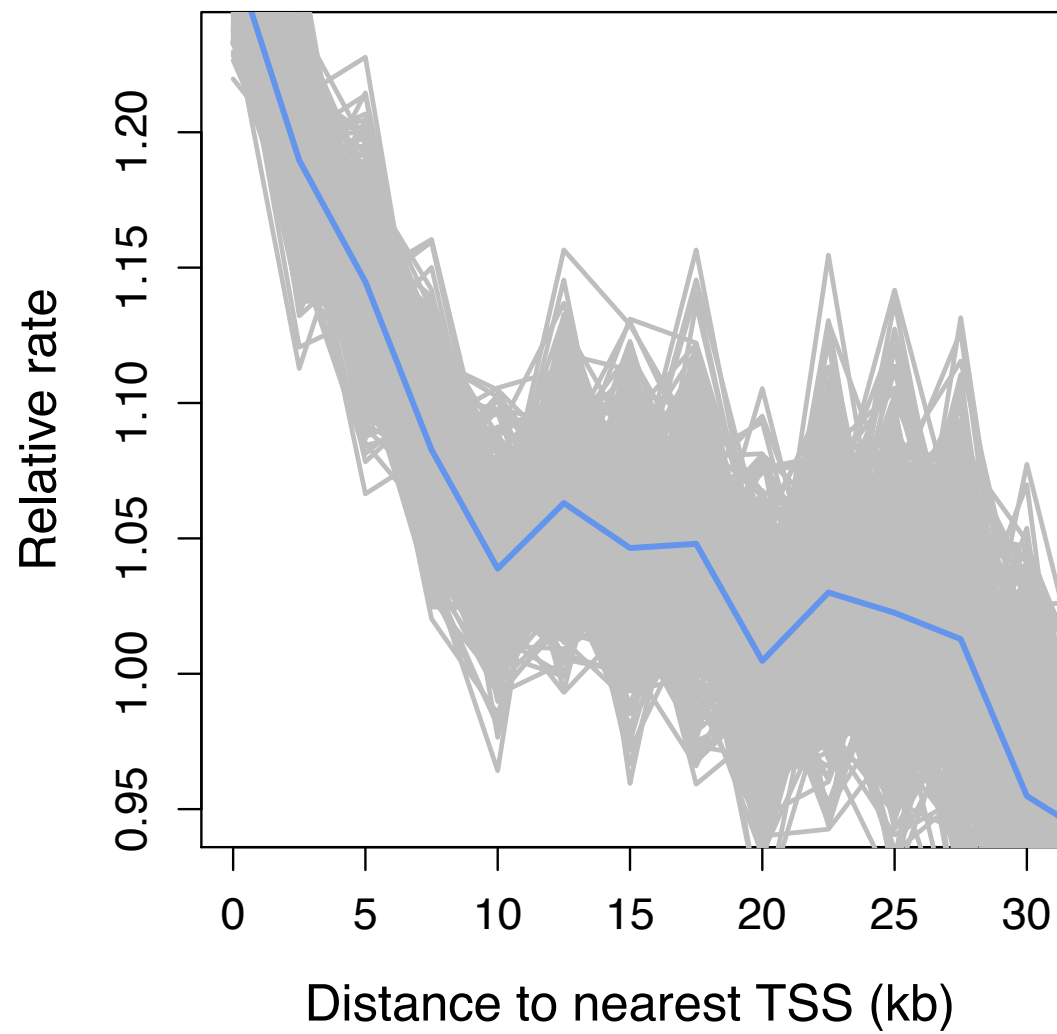

Supplement: supp [file elife_poa_e24133_Figure_4_Figure_Supplement_2.pdf › elife_poa_e24133_Figure_4_Figure_Supplement_2.pdf]

*Homo sapiens*

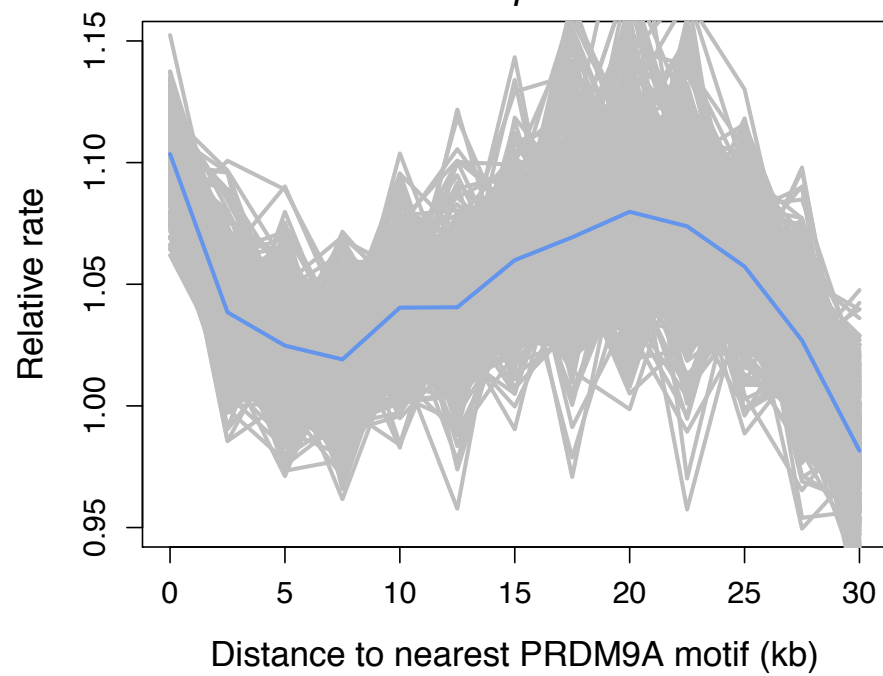

*Gorilla gorilla*

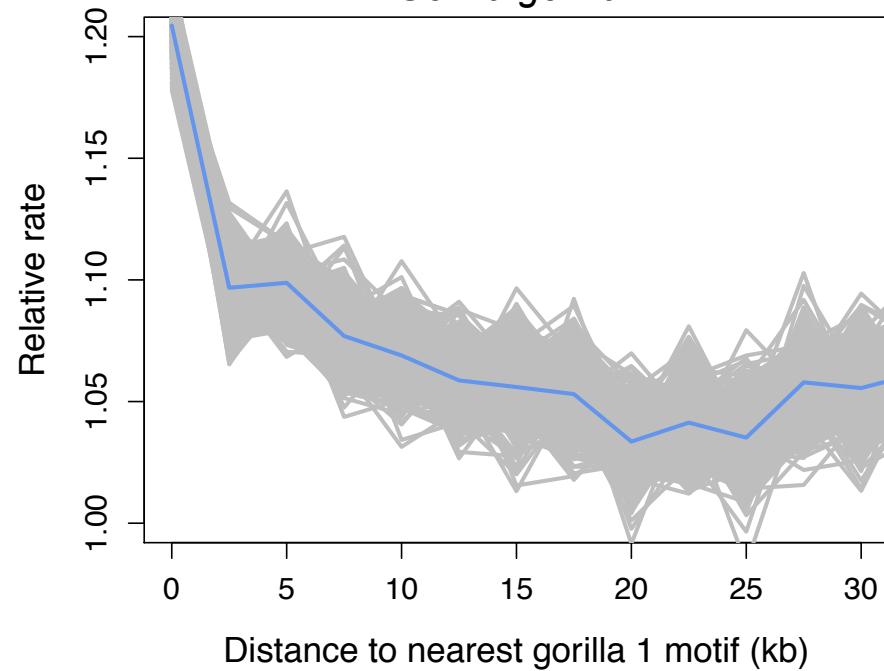

Supplement: supp [file elife_poa_e24133_Figure_4_Figure_Supplement_3.pdf › elife_poa_e24133_Figure_4_Figure_Supplement_3.pdf]

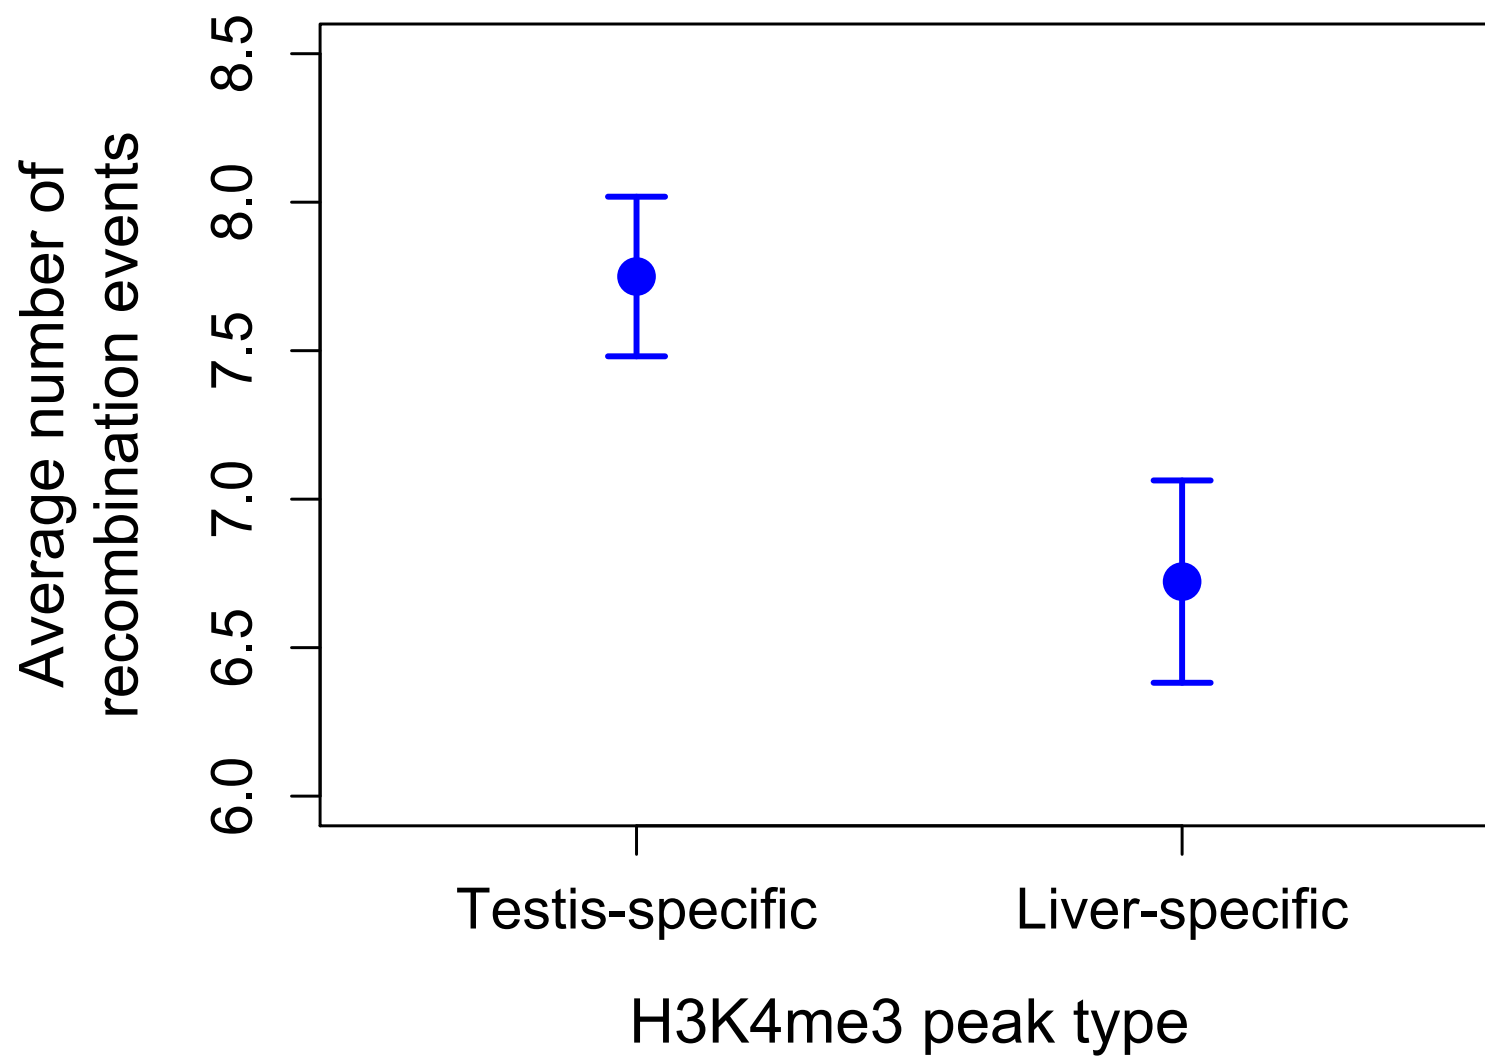

Supplement: supp [file elife_poa_e24133_Figure_4_Figure_Supplement_4.pdf › elife_poa_e24133_Figure_4_Figure_Supplement_4.pdf]

*X. birchmanni* and *X. malinche* predicted motif

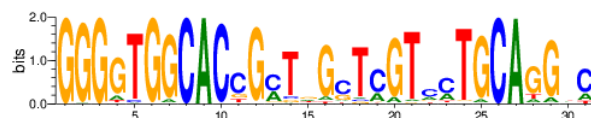

Reverse complement

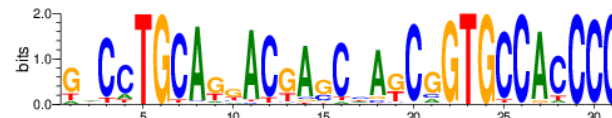

A)

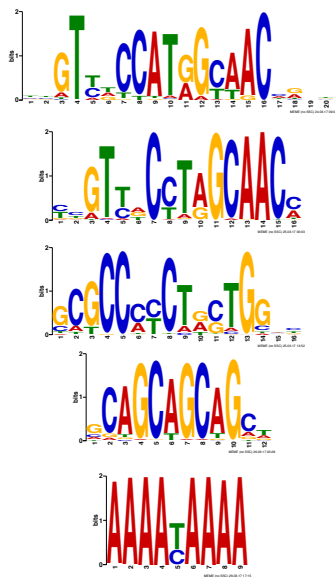

B)

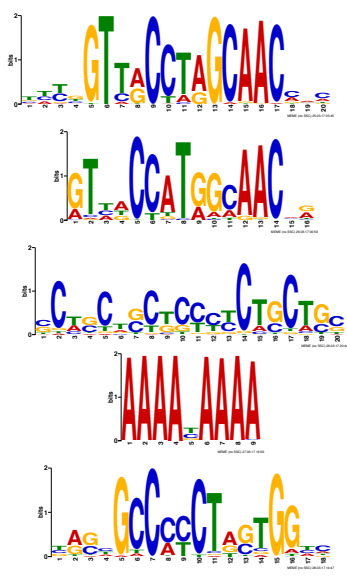

C)

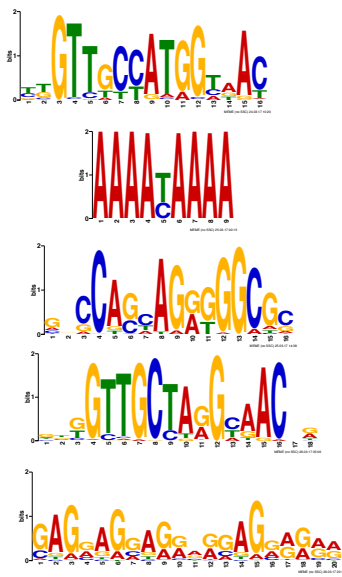

D)

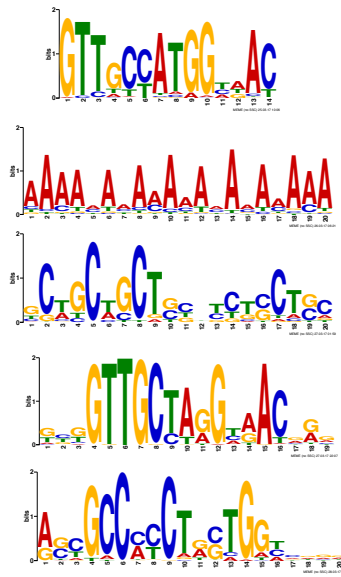

E)

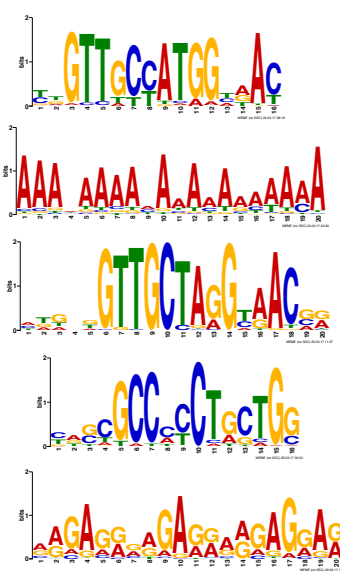

Supplement: supp [file elife_poa_e24133_Figure_4_Figure_Supplement_5.pdf › elife_poa_e24133_Figure_4_Figure_Supplement_5.pdf]

**a****Dog**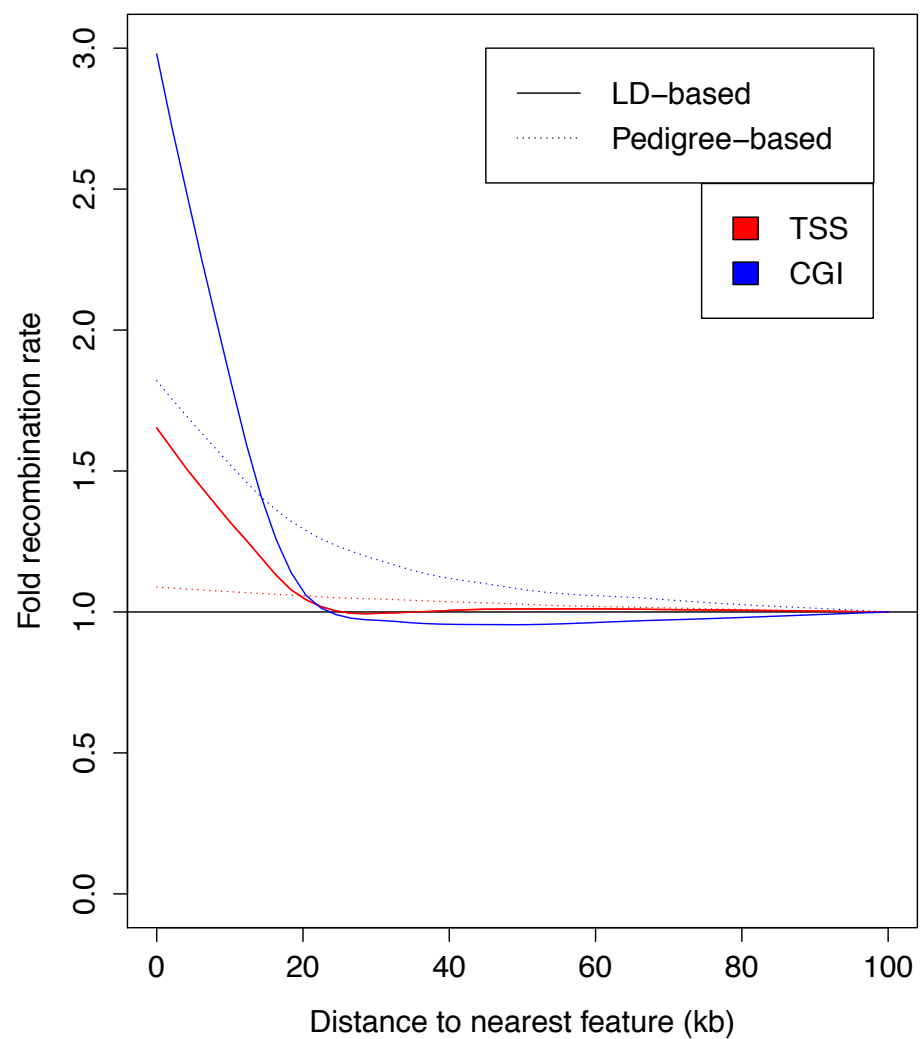**b****Human**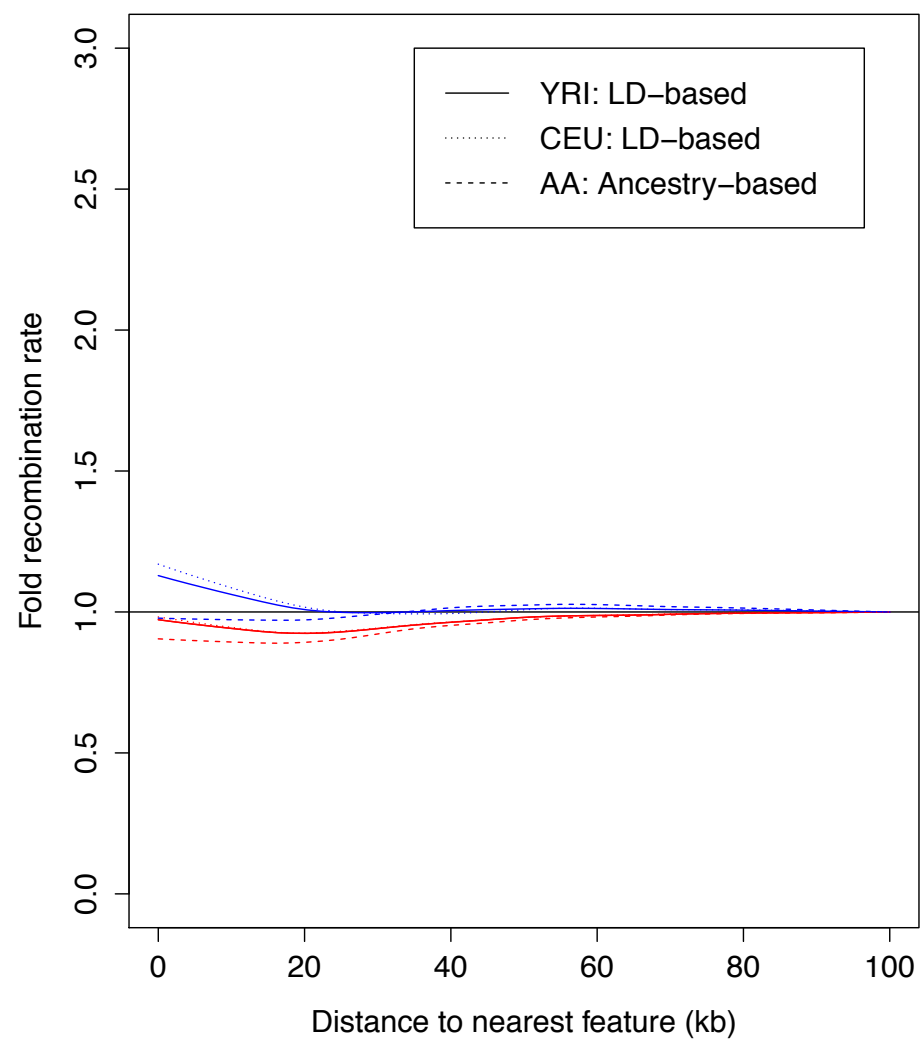

Supplement: supp [file elife_poa_e24133_Figure_5_Figure_Supplement_1.pdf › elife_poa_e24133_Figure_5_Figure_Supplement_1.pdf]
